# Supplementary material
Source: HighWire-hosted journal article supplement (https://www.annals.org/content/suppl/2008/02/27/148.5.379)
Supplement: Raina_AT2_148-5-379-DC1-2.pdf [file Raina_AT2_148-5-379-DC1-2.pdf]

Appendix Table 2. Study Characteristics and Effect Sizes for Outcomes Measured within Each Study\*

| Author<br>Year                                            | 1. Population<br>2. Interventions<br>and treatment<br>duration (TP)<br>3.<br>#<br>Randomized/#<br>completing trial                                             | 1. Criteria<br>for Diagnosis<br>2. Diagnosis<br>3. Disease<br>Severity                                     | Study Quality<br>Funding Source<br>Randomization<br>Blinding<br>Withdrawals | Cognitive<br>Function                                                                                     |                                                                                                                                                                       | Global<br>Assessment                                                                           |                                                                                                                   | Behavior/<br>Mood |                                                           | Quality of Life/<br>ADL                                                                                              |                        |
|-----------------------------------------------------------|----------------------------------------------------------------------------------------------------------------------------------------------------------------|------------------------------------------------------------------------------------------------------------|-----------------------------------------------------------------------------|-----------------------------------------------------------------------------------------------------------|-----------------------------------------------------------------------------------------------------------------------------------------------------------------------|------------------------------------------------------------------------------------------------|-------------------------------------------------------------------------------------------------------------------|-------------------|-----------------------------------------------------------|----------------------------------------------------------------------------------------------------------------------|------------------------|
|                                                           |                                                                                                                                                                |                                                                                                            |                                                                             | Measure                                                                                                   | Result<br>Effect Size*                                                                                                                                                | Measure                                                                                        | Result<br>Effect Size*                                                                                            | Measure           | Result<br>Effect Size*                                    | Measure                                                                                                              | Result<br>Effect Size* |
| <b>Donepezil versus Placebo (except otherwise stated)</b> |                                                                                                                                                                |                                                                                                            |                                                                             |                                                                                                           |                                                                                                                                                                       |                                                                                                |                                                                                                                   |                   |                                                           |                                                                                                                      |                        |
| Black<br>2003 (22)<br>Pratt<br>2002 (97)                  | 1. Community<br>dwelling, mean<br>age 73.9 years<br>and 55.2% male<br><br>2. A: Donepezil<br>5mg/d<br>B: Donepezil<br>10mg/d<br>TP: 24 weeks<br><br>3. 603/478 | 1. NINCDS-<br>AIREN<br><br>2. Vascular<br>Dementia<br><br>3. Probable<br>(70.5%) or<br>possible<br>(29.5%) | Industry Funded<br>Rand – 2/2<br>Blind – 2/2<br>Withdraw – 1/1              | ADAS-cog<br><br>ADAS-cog<br>(for<br>Probable<br>VaD<br>subgroup<br>only)<br><br>MMSE<br>(2 <sup>0</sup> ) | A: -1.68<br>(-2.77,-0.59)<br>B: -2.24<br>(-3.35,-1.13)<br><br>A: -1.67<br>(p=0.02)<br>B: -2.60<br>(p<0.001)<br><br>A: 0.65<br>(0.04, 1.26)<br>B: 1.10<br>(0.50, 1.70) | CIBIC+ (2 <sup>0</sup> )<br>RR<br>improved or<br>stabilized<br><br>CDR-SB<br>(2 <sup>0</sup> ) | A: 1.01<br>(0.88, 1.15)<br>B: 1.14<br>(1.01, 1.29)<br><br>A: -0.12<br>(-0.45, 0.21)<br>B: -0.36<br>(-0.68, -0.04) | NT                | ADFACS<br>(2 <sup>0</sup> )<br><br>IADL (2 <sup>0</sup> ) | A: -0.80<br>(-1.88, 0.28)<br>B: -0.91<br>(-2.02, 0.20)<br><br>A: -0.89<br>(-1.69,-0.09)<br>B: -0.74<br>(-1.56, 0.08) |                        |

| Author<br>Year        | 1. Population<br><br>2. Interventions<br>and treatment<br>duration (TP)<br><br>3.<br>#<br>Randomized/#<br>completing trial                                                            | 1. Criteria<br>for Diagnosis<br><br>2. Diagnosis<br><br>3. Disease<br>Severity                                | Study Quality<br><br>Funding Source<br>Randomization<br>Blinding<br>Withdrawals | Cognitive<br>Function  |                                                        | Global<br>Assessment                                                      |                                                                                                                                                                                  | Behavior/<br>Mood     |                               | Quality of Life/<br>ADL                                |                        |
|-----------------------|---------------------------------------------------------------------------------------------------------------------------------------------------------------------------------------|---------------------------------------------------------------------------------------------------------------|---------------------------------------------------------------------------------|------------------------|--------------------------------------------------------|---------------------------------------------------------------------------|----------------------------------------------------------------------------------------------------------------------------------------------------------------------------------|-----------------------|-------------------------------|--------------------------------------------------------|------------------------|
|                       |                                                                                                                                                                                       |                                                                                                               |                                                                                 | Measure                | Result<br>Effect Size*                                 | Measure                                                                   | Result<br>Effect Size*                                                                                                                                                           | Measure               | Result<br>Effect Size*        | Measure                                                | Result<br>Effect Size* |
| Burns<br>1999 (9)     | 1. Men and<br>women, ≥ 50<br>years of age<br><br>2. A: Donepezil<br>5mg<br>B: Donepezil<br>10mg<br>TP: 24w k<br>+ 6w PB<br>washout period<br>3. 818/632                               | 1. DSM-III-R<br>NINCDS-<br>ADRDA<br><br>2. Alzheimer's<br>disease<br><br>3. Probable<br>(mild to<br>moderate) | Industry Funded<br><br>Rand – 1/2<br>Blind – 1/2<br>Withdraw – 1/1              | ADAS-cog               | A: -1.00<br>(-1.74,-0.26)<br>B: -2.80<br>(-3.40,-2.20) | CIBIC+<br><br>CIBIC+<br>RR<br>improved<br><br>CDR-SB<br>(2 <sup>0</sup> ) | A: -0.20<br>(-0.42, 0.02)<br>B: -0.40<br>(-0.54, -0.26)<br><br>A: 1.49<br>(0.98, 2.26)<br>B: 1.78<br>(1.19, 2.67)<br><br>A: -0.27<br>(-0.43, -0.11)<br>B: -0.40<br>(-0.54,-0.26) | NT                    | IDDD<br>QoL (2 <sup>0</sup> ) | A: -0.20<br>(-1.31, 0.91)<br>B: -2.00<br>(-3.11,-0.89) |                        |
| Courtney<br>2004 (24) | 1. Community<br>Dwelling, mean<br>age 75 years and<br>41% male<br><br>2. Donepezil<br>5mg -10mg<br>TP: 48wk<br>2y follow-up<br><br>3. 565/293 in<br>phase 1 and 111<br>in phase 2 and | 1. DSM IV<br><br>2. Alzheimer's<br>disease<br><br>3. Mild to<br>moderate                                      | Not Industry<br>Funded<br><br>Rand – 1/2<br>Blind – 2/2<br>Withdraw –1/1        | MMSE (2 <sup>0</sup> ) | 0.83<br>(0.5, 1.2)                                     |                                                                           |                                                                                                                                                                                  | NPI (2 <sup>0</sup> ) | 0.31<br>(-0.9, 1.5)           | BADLS                                                  | 1.02<br>(0.5, 1.6)     |



| Author<br>Year      | 1. Population<br>2. Interventions<br>and treatment<br>duration (TP)<br>3.<br>#<br>Randomized/#<br>completing trial | 1. Criteria<br>for Diagnosis<br>2. Diagnosis<br>3. Disease<br>Severity                           | Study Quality<br>Funding Source<br>Randomization<br>Blinding<br>Withdrawals | Cognitive<br>Function  |                        | Global<br>Assessment |                        | Behavior/<br>Mood           |                        | Quality of Life/<br>ADL |                        |
|---------------------|--------------------------------------------------------------------------------------------------------------------|--------------------------------------------------------------------------------------------------|-----------------------------------------------------------------------------|------------------------|------------------------|----------------------|------------------------|-----------------------------|------------------------|-------------------------|------------------------|
|                     |                                                                                                                    |                                                                                                  |                                                                             | Measure                | Result<br>Effect Size* | Measure              | Result<br>Effect Size* | Measure                     | Result<br>Effect Size* | Measure                 | Result<br>Effect Size* |
| Holmes<br>2004 (25) | 1. Mean age<br>80.9 years and<br>38.5% male<br><br>2. Donepezil<br>5mg-10mg<br>TP: 24 weeks<br><br>3. 96/80        | 1. NINCDS<br>ADRDA<br><br>2. Alzheimer's<br>disease<br><br>3. Probable<br>(mild to<br>moderate)  | Industry Funded<br>Rand – 2/2<br>Blind – 2/2<br>Withdraw – 1/1              | MMSE (2 <sup>0</sup> ) | 1.70<br>(0.17, 3.23)   | NT                   | NPI                    | -6.20<br>(-11.37,-<br>1.03) |                        | NT                      |                        |
| Kemp<br>2003 (26)   | 1. Community<br>dwelling, mean<br>age 72 years<br><br>2. Donepezil<br>5mg-10mg<br>TP: 4 months<br><br>3. 12/11     | 1. NINCDS-<br>ADRDA<br><br>2. Alzheimer's<br>disease<br><br>3. Probable<br>(mild to<br>moderate) | Not Industry<br>Funded<br><br>Rand – 1/2<br>Blind – 1/2<br>Withdraw – 1/1   | ADAS-cog               | NR                     | NT                   |                        | NT                          |                        | NT                      |                        |

| Author<br>Year        | 1. Population<br>2. Interventions<br>and treatment<br>duration (TP)<br>3.<br>#<br>Randomized/#<br>completing trial                                                                            | 1. Criteria<br>for Diagnosis<br>2. Diagnosis<br>3. Disease<br>Severity                           | Study Quality<br>Funding Source<br>Randomization<br>Blinding<br>Withdrawals    | Cognitive<br>Function |                        | Global<br>Assessment |                        | Behavior/<br>Mood |                             | Quality of Life/<br>ADL |                        |
|-----------------------|-----------------------------------------------------------------------------------------------------------------------------------------------------------------------------------------------|--------------------------------------------------------------------------------------------------|--------------------------------------------------------------------------------|-----------------------|------------------------|----------------------|------------------------|-------------------|-----------------------------|-------------------------|------------------------|
|                       |                                                                                                                                                                                               |                                                                                                  |                                                                                | Measure               | Result<br>Effect Size* | Measure              | Result<br>Effect Size* | Measure           | Result<br>Effect Size*      | Measure                 | Result<br>Effect Size* |
| Krishnan<br>2003 (27) | 1. Women ( $\geq 2$<br>years<br>postmenopausal)<br>and men $\geq 50$<br>years of age<br><br>2. Donepezil<br>5mg - 10mg<br>TP: 24 weeks<br><br>3. 67/51                                        | 1. NINCDS<br>DSM IV<br><br>2. Alzheimer's<br>disease<br><br>3. Probable<br>(mild to<br>moderate) | Industry Funded<br><br>Rand – 2/2<br>Blind – 1/2<br>Withdraw – 1/1             | ADAS-cog              | 4<br>( $p < 0.02$ )    |                      | NT                     |                   | NT                          |                         | NT                     |
| Leroi<br>2003 (28)    | 1. Community<br>dwelling, man<br>age 68.5 y,<br>44.4% male in<br>placebo group<br>and 85.7% male<br>in donepezil<br>group<br><br>2. Donepezil<br>2.5mg - 10mg<br>TP: 18 weeks<br><br>3. 16/10 | 1. DSM IV<br><br>2. Parkinson's<br>disease<br><br>3. Mild to<br>moderate                         | Partially Funded by<br>industry<br>Rand – 1/2<br>Blind – 1/2<br>Withdraw – 1/1 | MMSE                  | -1.11<br>(-2.92, 0.7)  | DRS-total            | -0.68<br>(-7.63, 6.28) | NPI               | -0.06<br>(-11.49,<br>11.38) |                         | NT                     |
|                       |                                                                                                                                                                                               |                                                                                                  |                                                                                | DRS-<br>Memory        | 3.33<br>(0.35, 6.3)    |                      |                        |                   |                             |                         |                        |
|                       |                                                                                                                                                                                               |                                                                                                  |                                                                                | HVLT-R                | 0.72<br>(-4.37, 5.81)  |                      |                        |                   |                             |                         |                        |

| Author<br>Year     | 1. Population<br>2. Interventions<br>and treatment<br>duration (TP)<br>3.<br>#<br>Randomized/#<br>completing trial                                                              | 1. Criteria<br>for Diagnosis<br>2. Diagnosis<br>3. Disease<br>Severity                           | Study Quality<br>Funding Source<br>Randomization<br>Blinding<br>Withdrawals | Cognitive<br>Function |                                                     | Global<br>Assessment |                                                       | Behavior/<br>Mood |                        | Quality of Life/<br>ADL                                                             |                        |
|--------------------|---------------------------------------------------------------------------------------------------------------------------------------------------------------------------------|--------------------------------------------------------------------------------------------------|-----------------------------------------------------------------------------|-----------------------|-----------------------------------------------------|----------------------|-------------------------------------------------------|-------------------|------------------------|-------------------------------------------------------------------------------------|------------------------|
|                    |                                                                                                                                                                                 |                                                                                                  |                                                                             | Measure               | Result<br>Effect Size*                              | Measure              | Result<br>Effect Size*                                | Measure           | Result<br>Effect Size* | Measure                                                                             | Result<br>Effect Size* |
| Mazza 2006<br>(31) | 1. Mean age<br>68.5 years and<br>46% male<br><br>2. A: Donepezil<br>5mg<br>B: Donepezil<br>5mg vs. Ginkgo<br>biloba 160 mg/d<br>TP: 24 weeks<br><br>3. 76/60                    | 1. DSM IV<br><br>2. Alzheimer's<br>disease<br><br>3. Mild to<br>moderate                         | Industry Funded<br>Rand – 2/2<br>Blind – 2/2<br>Withdraw – 1/1              | MMSE                  | A: 1.45<br>(-1.96,4.86)<br>B: 0.60<br>(-2.79, 3.99) | CGI                  | A: -1.05<br>(-1.43,-0.67)<br>B: 0.00<br>(-0.49, 0.49) |                   | NT                     |                                                                                     | NT                     |
| Mohs<br>2001 (15)  | 1. mean age 75.4<br>years<br>(range: 50-93y),<br>37% male,<br>92.15% white,<br>2.75% black,<br>and 5.1% other<br><br>2. Donepezil<br>5mg-10mg<br>TP: 54 weeks<br><br>3. 431/111 | 1. NINCDS<br>DSM IV<br><br>2. Alzheimer's<br>disease<br><br>3. probable<br>(mild to<br>moderate) | Industry Funded<br>Rand – 1/2<br>Blind – 1/2<br>Withdraw – 1/1              | MMSE(2 <sup>0</sup> ) | (p<0.001)                                           |                      | NT                                                    |                   | NT                     | ADFACS<br>(2 <sup>0</sup> )<br>Instrumental<br>ADL (p=0.001)<br>Basic ADL (p=0.007) |                        |

| Author<br>Year        | 1. Population<br><br>2. Interventions<br>and treatment<br>duration (TP)<br><br>3.<br>#<br>Randomized/#<br>completing trial                                 | 1. Criteria<br>for Diagnosis<br><br>2. Diagnosis<br><br>3. Disease<br>Severity                                                                                                                                                          | Study Quality<br><br>Funding Source<br>Randomization<br>Blinding<br>Withdrawals | Cognitive<br>Function                                       |                                                                                                                 | Global<br>Assessment                                     |                                                                                                                 | Behavior/<br>Mood                         |                                                     | Quality of Life/<br>ADL |                        |
|-----------------------|------------------------------------------------------------------------------------------------------------------------------------------------------------|-----------------------------------------------------------------------------------------------------------------------------------------------------------------------------------------------------------------------------------------|---------------------------------------------------------------------------------|-------------------------------------------------------------|-----------------------------------------------------------------------------------------------------------------|----------------------------------------------------------|-----------------------------------------------------------------------------------------------------------------|-------------------------------------------|-----------------------------------------------------|-------------------------|------------------------|
|                       |                                                                                                                                                            |                                                                                                                                                                                                                                         |                                                                                 | Measure                                                     | Result<br>Effect Size*                                                                                          | Measure                                                  | Result<br>Effect Size*                                                                                          | Measure                                   | Result<br>Effect Size*                              | Measure                 | Result<br>Effect Size* |
| Petersen<br>2005 (32) | 1. Mean age<br>72.9 years and<br>54 % male<br><br>2. A: Donepezil<br>10mg<br>B: Donepezil<br>10mg vs.<br>Vitamin 2000IU<br>TP: 36 months<br><br>3. 790/769 | 1. Amnestic<br>mild cognitive<br>impairment<br>Logical<br>memory<br>delayed recall<br>score = 1.5 to<br>2 standard<br>deviations<br>CDR = 0.5<br>MMSE = 24-<br>30<br><br>2. Amnestic<br>mild cognitive<br>impairment<br><br>3. Amnestic | Public Funding (PF)<br>Rand – 1/2<br>Blind – 1/2<br>Withdraw – 1/1              | ADAS-cog<br>(2 <sup>0</sup> )<br><br>MMSE (2 <sup>0</sup> ) | A: -0.06<br>(-1.18,1.06)<br>B: -0.91<br>(-1.99,0.17)<br><br>A: 0.44<br>(-0.23,1.11)<br>B: -0.11<br>(-0.75,0.53) | GDS (2 <sup>0</sup> )<br><br>CDR-SB<br>(2 <sup>0</sup> ) | A: 0.03<br>(-0.13,0.19)<br>B: -0.05<br>(-0.21,0.11)<br><br>A: -0.04<br>(-0.44,0.36)<br>B: -0.07<br>(-0.44,0.30) | ADL (2 <sup>0</sup> )                     | A: 0.13<br>(-1.40,1.66)<br>B: -0.63<br>(-2.14,0.88) |                         | NT                     |
| Prasher<br>2002 (12)  | 1. Community<br>dwelling, mean<br>age 54 years and<br>50.0% male<br><br>2. Donepezil<br>5mg - 10mg<br>TP: 24 weeks<br><br>3. 31/27                         | 1. ICD -10<br><br>2. Alzheimer's<br>and Down's<br>Syndrome<br><br>3. Mild to<br>Moderate                                                                                                                                                | Industry Funded<br>Rand – 2/2<br>Blind – 1/2<br>Withdraw – 1/1                  | DMR<br><br>SIB(2 <sup>0</sup> )                             | -5.4<br>(p=0.22)<br><br>10.8<br>(p=0.06)                                                                        | NPI(2 <sup>0</sup> )<br>2.2<br>(-3.88, 8.28)             |                                                                                                                 | ABS(2 <sup>0</sup> )<br>7.6<br>(p = 0.51) |                                                     |                         |                        |

| Author<br>Year                     | 1. Population<br>2. Interventions<br>and treatment<br>duration (TP)<br>3.<br>#<br>Randomized/#<br>completing trial | 1. Criteria<br>for Diagnosis<br>2. Diagnosis<br>3. Disease<br>Severity | Study Quality<br>Funding Source<br>Randomization<br>Blinding<br>Withdrawals | Cognitive<br>Function  |                                                                                   | Global<br>Assessment                    |                                                                                | Behavior/<br>Mood |                         | Quality of Life/<br>ADL                                                              |                        |
|------------------------------------|--------------------------------------------------------------------------------------------------------------------|------------------------------------------------------------------------|-----------------------------------------------------------------------------|------------------------|-----------------------------------------------------------------------------------|-----------------------------------------|--------------------------------------------------------------------------------|-------------------|-------------------------|--------------------------------------------------------------------------------------|------------------------|
|                                    |                                                                                                                    |                                                                        |                                                                             | Measure                | Result<br>Effect Size*                                                            | Measure                                 | Result<br>Effect Size*                                                         | Measure           | Result<br>Effect Size*  | Measure                                                                              | Result<br>Effect Size* |
| Rogers<br>1996 (19)                | 1. mean age 71.8<br>years (range: 54<br>-85y), 40% male<br>and 99% white                                           | 1. DSM-III-R<br>NINCDS                                                 | Industry Funded                                                             | ADAS-Cog               | A: -1.60<br>(-3.84,0.64)<br>B: -2.10<br>(-4.35,0.15)<br>C: -3.20<br>(-5.09,-1.31) | CGIC(2 <sup>0</sup> )<br>RR<br>improved | A: 1.04<br>(0.84,1.28)<br>B: 1.03<br>(0.84,1.27)<br>C: 1.12<br>(0.93,1.35)     | NT                | ADL (2 <sup>0</sup> )   | A:2.50(-<br>8.40, 13.40)<br>B:-0.90(-<br>8.62,6.82)<br>C:-4.60(-<br>12.34,3.14)      |                        |
| Auxiliary:<br>Rogers<br>2000 (100) | 2. A: Donepezil<br>1mg/d                                                                                           | 2. Alzheimer's<br>disease                                              | Rand – 1/2<br>Blind – 1/2<br>Withdraw – 1/1                                 | MMSE (2 <sup>0</sup> ) | A: -0.60<br>(-1.86,0.66)<br>B: -0.30<br>(-1.62,1.02)<br>C: 0.80<br>(-0.36,1.96)   | CDR-SB(2 <sup>0</sup> )                 | A: 0.08<br>(-0.53,0.69)<br>B: 0.13<br>(-0.61,0.87)<br>C: -0.21<br>(-0.72,0.30) |                   | QoL-P (2 <sup>0</sup> ) | A: 2.00(-<br>13.11,17.11)<br>B: 3.90(-<br>13.52,21.32)<br>C: 10.10(-<br>11.23,31.43) |                        |
| Neumann<br>1999 (101)              | B: Donepezil<br>3mg/d                                                                                              | 3. Mild to<br>moderate                                                 |                                                                             |                        |                                                                                   |                                         |                                                                                |                   | QoL-C (2 <sup>0</sup> ) | A:-9.00(-<br>28.20,10.20)<br>B:-3.70(-<br>21.81,14.41)<br>C:-3.40(-<br>25.71,18.91)  |                        |
| Rogers<br>1998 (102)               | C: Donepezil<br>5mg/d<br>TP: 12 weeks<br>+ 2 weeks<br>Placebo washout<br>period<br>3. 161/141                      |                                                                        |                                                                             |                        |                                                                                   |                                         |                                                                                |                   |                         |                                                                                      |                        |

| Author<br>Year       | 1. Population<br><br>2. Interventions<br>and treatment<br>duration (TP)<br><br>3.<br>#<br>Randomized/#<br>completing trial | 1. Criteria<br>for Diagnosis<br><br>2. Diagnosis<br><br>3. Disease<br>Severity        | Study Quality<br><br>Funding Source<br>Randomization<br>Blinding<br>Withdrawals | Cognitive<br>Function                                         |                                                                                        | Global<br>Assessment                                         |                                                                                                               | Behavior/<br>Mood |                        | Quality of Life/<br>ADL                               |                        |
|----------------------|----------------------------------------------------------------------------------------------------------------------------|---------------------------------------------------------------------------------------|---------------------------------------------------------------------------------|---------------------------------------------------------------|----------------------------------------------------------------------------------------|--------------------------------------------------------------|---------------------------------------------------------------------------------------------------------------|-------------------|------------------------|-------------------------------------------------------|------------------------|
|                      |                                                                                                                            |                                                                                       |                                                                                 | Measure                                                       | Result<br>Effect Size*                                                                 | Measure                                                      | Result<br>Effect Size*                                                                                        | Measure           | Result<br>Effect Size* | Measure                                               | Result<br>Effect Size* |
| Rogers<br>1998a (18) | 1. Mean age<br>73.7 years<br>(range: 50-94),<br>Auxiliary:<br>Doody<br>2001 (103)<br>Steele<br>1999 (104)                  | 1. NINCDS<br>DSM-III-R<br><br>2. Alzheimer's<br>disease<br><br>3. Mild to<br>moderate | Industry Funded<br>Rand – 1/2<br>Blind – 1/2<br>Withdraw – 1/1                  | ADAS-cog                                                      | A: -3.10<br>(-4.29,-1.91)<br>B: -2.50<br>(-3.69,-1.31)                                 | CIBIC +                                                      | A: -0.40<br>(-0.61,-0.19)<br>B: -0.30<br>(-0.51,-0.09)                                                        | NT                | QoL (2 <sup>0</sup> )  | A: -8.30(-<br>15.78,-0.82)<br>B: 1.70(-<br>5.78,9.18) |                        |
|                      | 2. A: Donepezil<br>10mg<br>B: Donepezil<br>5mg<br>TP: 12weeks<br>+ 3 weeks<br>Placebo washout<br>period<br><br>3. 468/412  |                                                                                       |                                                                                 | ADAS-cog<br>≥ 4 point<br>change<br><br>MMSE (2 <sup>0</sup> ) | PB = 30%<br>DPZ 10 mg<br>= 60%<br><br>A: 1.26<br>(0.58,1.94)<br>B: 0.96<br>(0.27,1.65) | CIBIC +<br>RR<br>improved<br><br>CDR-SB<br>(2 <sup>0</sup> ) | A: 2.12<br>(1.43, 3.15)<br>B: 1.78<br>(1.18, 2.69)<br><br>A: -0.17<br>(-0.47,0.13)<br>B: 0.04<br>(-0.27,0.35) |                   |                        |                                                       |                        |

| Author<br>Year                                             | 1. Population<br>2. Interventions<br>and treatment<br>duration (TP)<br>3.<br>#<br>Randomized/#<br>completing trial | 1. Criteria<br>for Diagnosis<br>2. Diagnosis<br>3. Disease<br>Severity | Study Quality<br>Funding Source<br>Randomization<br>Blinding<br>Withdrawals | Cognitive<br>Function           |                                                            | Global<br>Assessment        |                                                          | Behavior/<br>Mood |                        | Quality of Life/<br>ADL    |                        |
|------------------------------------------------------------|--------------------------------------------------------------------------------------------------------------------|------------------------------------------------------------------------|-----------------------------------------------------------------------------|---------------------------------|------------------------------------------------------------|-----------------------------|----------------------------------------------------------|-------------------|------------------------|----------------------------|------------------------|
|                                                            |                                                                                                                    |                                                                        |                                                                             | Measure                         | Result<br>Effect Size*                                     | Measure                     | Result<br>Effect Size*                                   | Measure           | Result<br>Effect Size* | Measure                    | Result<br>Effect Size* |
| Rogers<br>1998b (17)                                       | 1. Mean age<br>73.6 years<br>(range: 51-94<br>years), 38%<br>male and 95%<br>white                                 | 1. NINCDS<br>DSM-III-R                                                 | Industry Funded<br>Rand – 1/2<br>Blind – 1/2<br>Withdraw – 1/1              | ADAS-cog                        | A: -2.88<br>(-4.27,-1.49)<br>B: -2.49<br>(-3.88,-1.10)     | CIBIC +                     | A: -0.44<br>(-0.65,-0.23)<br>B: -0.36<br>(-0.60,-0.12)   | NT                | QoL (2 <sup>0</sup> )  | A: (p>0.05)<br>B: (p=0.05) |                        |
| Auxiliary:<br>Doody<br>2001 (103)<br>Sparano<br>1998 (105) | 2. A: Donepezil<br>10mg<br>B: Donepezil<br>5mg<br>TP: 24 weeks<br>3. 473/367                                       | 2. Alzheimer's<br>disease<br>3. Mild to<br>moderate                    |                                                                             | ADAS-cog<br>≥ 4 point<br>change | PB = 26.8%,<br>DPZ 5 mg =<br>37.8%<br>DPZ 10 mg<br>= 53.5% | CIBIC +<br>RR<br>improved   | A: 2.22<br>(1.31, 3.76)<br>B: 2.34<br>(1.39, 3.95)       |                   |                        |                            |                        |
|                                                            |                                                                                                                    |                                                                        |                                                                             | ADAS-cog<br>≥ 7 point<br>change | PB = 7.8%,<br>DPZ 5mg =<br>15.4%<br>DPZ 10 mg<br>= 25.2%   | CDR-SB<br>(2 <sup>0</sup> ) | A: -0.60<br>(-0.99, -0.21)<br>B: -0.59<br>(-0.98, -0.20) |                   |                        |                            |                        |
|                                                            |                                                                                                                    |                                                                        |                                                                             | MMSE (2 <sup>0</sup> )          | A: 1.36<br>(0.57, 2.15)<br>B: 1.21<br>(0.42, 2.00)         |                             |                                                          |                   |                        |                            |                        |



| Author<br>Year       | 1. Population<br><br>2. Interventions<br>and treatment<br>duration (TP)<br><br>3.<br>#<br>Randomized/#<br>completing trial                                                                   | 1. Criteria<br>for Diagnosis<br><br>2. Diagnosis<br><br>3. Disease<br>Severity                                                                     | Study Quality<br><br>Funding Source<br>Randomization<br>Blinding<br>Withdrawals | Cognitive<br>Function                                                                                                                                                                                                     |                                                        | Global<br>Assessment |                                                 | Behavior/<br>Mood |                                    | Quality of Life/<br>ADL |                        |
|----------------------|----------------------------------------------------------------------------------------------------------------------------------------------------------------------------------------------|----------------------------------------------------------------------------------------------------------------------------------------------------|---------------------------------------------------------------------------------|---------------------------------------------------------------------------------------------------------------------------------------------------------------------------------------------------------------------------|--------------------------------------------------------|----------------------|-------------------------------------------------|-------------------|------------------------------------|-------------------------|------------------------|
|                      |                                                                                                                                                                                              |                                                                                                                                                    |                                                                                 | Measure                                                                                                                                                                                                                   | Result<br>Effect Size*                                 | Measure              | Result<br>Effect Size*                          | Measure           | Result<br>Effect Size*             | Measure                 | Result<br>Effect Size* |
| Seltzer<br>2004 (10) | 1. Generally<br>healthy<br>ambulatory<br>patients aged 50<br>to 92 years,<br>mean age of 74.1<br>years and 46.4%<br>male<br><br>2. Donepezil<br>5mg - 10mg<br>TP: 24 weeks<br><br>3. 153/116 | 1. DSM IV<br><br>2. Alzheimer's<br>disease<br><br>3. Probable                                                                                      | Industry Funded<br>Rand – 1/2<br>Blind – 1/2<br>Withdraw – 1/1                  | ADAS-cog<br>-2.30<br>(-4.11,-0.49)<br><br>ADAS-cog<br>≥ 4 point<br>change<br>PB = 16%<br>DPZ = 37%<br><br>ADAS-cog<br>≥ 7 point<br>change<br>PB = 7%<br>DPZ = 10%<br><br>MMSE (2 <sup>0</sup> )<br>-1.20<br>(-2.73, 0.33) | CDR-SB(2 <sup>0</sup> )<br>(p > 0.05)                  |                      | Apathy<br>Scale (2 <sup>0</sup> )<br>(p > 0.05) |                   |                                    |                         |                        |
| Tariot<br>2001 (16)  | 1. Institution<br>dwelling, mean<br>age 85.7y<br>(range: 65-100y)<br>and 18% male<br><br>2. Donepezil<br>5mg - 10mg<br>TP: 24 weeks<br><br>3. 208/162                                        | 1. NINCDS<br><br>2. Alzheimer's<br>disease<br><br>3. Probable or<br>possible or<br>with cerebro-<br>vascular<br>disease<br>(moderate to<br>severe) | Industry Funded<br>Rand – 2/2<br>Blind – 2/2<br>Withdraw – 1/1                  | MMSE (2 <sup>0</sup> )<br>0.70<br>(0.14, 1.26)<br><br>MMSE<br>≥ 3 point<br>change<br>PB = 36%<br>DPZ = 51%<br>(p<0.05)                                                                                                    | CDR-SB<br>(2 <sup>0</sup> )<br>-0.80<br>(-1.12, -0.48) |                      | NPI-NH<br>2.60<br>(-2.67, 7.87)                 |                   | PSMS (2 <sup>0</sup> )<br>(p>0.05) |                         |                        |

| Author<br>Year      | 1. Population<br><br>2. Interventions<br>and treatment<br>duration (TP)<br><br>3.<br>#<br>Randomized/#<br>completing trial                                                                         | 1. Criteria<br>for Diagnosis<br><br>2. Diagnosis<br><br>3. Disease<br>Severity                   | Study Quality<br><br>Funding Source<br>Randomization<br>Blinding<br>Withdrawals | Cognitive<br>Function         |                                                                    | Global<br>Assessment |                        | Behavior/<br>Mood         |                        | Quality of Life/<br>ADL |                        |
|---------------------|----------------------------------------------------------------------------------------------------------------------------------------------------------------------------------------------------|--------------------------------------------------------------------------------------------------|---------------------------------------------------------------------------------|-------------------------------|--------------------------------------------------------------------|----------------------|------------------------|---------------------------|------------------------|-------------------------|------------------------|
|                     |                                                                                                                                                                                                    |                                                                                                  |                                                                                 | Measure                       | Result<br>Effect Size*                                             | Measure              | Result<br>Effect Size* | Measure                   | Result<br>Effect Size* | Measure                 | Result<br>Effect Size* |
| Thomas<br>2001 (20) | 1. Mean age<br>66.5 years<br>(range: 58-73y)<br>and 46% male<br><br>2. Donepezil<br>5mg - 10mg<br>TP: 6 months<br><br>3. 60/54                                                                     | 1. NINCDS<br><br>2. Alzheimer's<br>disease<br><br>3. Mild to<br>moderate                         | Not reported<br>Rand -2/2<br>Blind - 1/2<br>Withdraw - 1/1                      | ADAS-cog<br>MMSE<br>WAIS      | -7.12<br>(p<0.001)<br><br>1.00<br>(p=0.06)<br><br>4.00<br>(p=0.43) | NT                   |                        | NT                        |                        | NT                      |                        |
| Tune<br>2003 (29)   | 1. Mean age<br>72.2 years<br>(placebo), 73.7<br>years<br>(donepezil),<br>28.6% male<br>(placebo) and<br>21.4% male<br>(donepezil)<br><br>2. Donepezil<br>5mg -10mg<br>TP: 24 weeks<br><br>3. 28/26 | 1. NINCDS-<br>ADRDA<br><br>2. Alzheimer's<br>disease<br><br>3. Probable<br>(Mild to<br>moderate) | Industry Funded<br>Rand - 1/2<br>Blind - 1/2<br>Withdraw - 1/1                  | ADAS-cog<br>(2 <sup>0</sup> ) | -2.09<br>(-4.96, 0.78)                                             | NT                   | NPI (2 <sup>0</sup> )  | 2.75<br>(-9.29,<br>14.79) |                        | NT                      |                        |

| Author<br>Year                                    | 1. Population<br><br>2. Interventions<br>and treatment<br>duration (TP)<br><br>3.<br>#<br>Randomized/#<br>completing trial                         | 1. Criteria<br>for Diagnosis<br><br>2. Diagnosis<br><br>3. Disease<br>Severity       | Study Quality<br><br>Funding Source<br>Randomization<br>Blinding<br>Withdrawals | Cognitive<br>Function                  |                                                                                                                | Global<br>Assessment                                         |                                                                                                                 | Behavior/<br>Mood                       |                             | Quality of Life/<br>ADL                              |                        |
|---------------------------------------------------|----------------------------------------------------------------------------------------------------------------------------------------------------|--------------------------------------------------------------------------------------|---------------------------------------------------------------------------------|----------------------------------------|----------------------------------------------------------------------------------------------------------------|--------------------------------------------------------------|-----------------------------------------------------------------------------------------------------------------|-----------------------------------------|-----------------------------|------------------------------------------------------|------------------------|
|                                                   |                                                                                                                                                    |                                                                                      |                                                                                 | Measure                                | Result<br>Effect Size*                                                                                         | Measure                                                      | Result<br>Effect Size*                                                                                          | Measure                                 | Result<br>Effect Size*      | Measure                                              | Result<br>Effect Size* |
| Wilkinson<br>2003 (106)<br>Pratt<br>2002 (107)    | 1. Mean age<br>75.0 years and<br>59.9% male<br><br>2. A: Donepezil<br>5mg<br>B: Donepezil<br>10mg<br>TP: 24 weeks<br><br>3. 616/491                | 1. NINCDS-<br>AIREN<br><br>2. Vascular<br>dementia<br><br>3. Probable or<br>possible | Partially Funded by<br>industry<br>Rand – 2/2<br>Blind – 2/2<br>Withdraw – 1/1  | ADAS-cog<br><br>MMSE (2 <sup>0</sup> ) | A: -1.44<br>(-2.52,-0.36)<br>B: -2.07<br>(-3.32,-0.82)<br><br>A: 1.29<br>(0.60,1.98)<br>B: 1.09<br>(0.40,1.78) | CIBIC +<br>RR<br>improved<br><br>CDR-SB<br>(2 <sup>0</sup> ) | A: 1.56<br>(1.16, 2.11)<br>B: 1.29<br>(0.94, 1.77)<br><br>A: -0.27<br>(-0.66,0.12)<br>B: -0.44<br>(-0.83,-0.05) | NT                                      | ADFACS<br>(2 <sup>0</sup> ) | A: -0.62<br>(-1.81,0.57)<br>B: -0.65<br>(-1.79,0.49) |                        |
| Winblad<br>2001 (13)<br><br>Winblad<br>2006 (108) | 1. Mean age<br>72.5y (range: 50<br>– 87 years), 36%<br>male, and 100%<br>white<br><br>2. Donepezil<br>5mg - 10mg<br>TP: 52 weeks<br><br>3. 286/192 | 1. DSM IV<br>NINCDS<br><br>2. Alzheimer's<br>disease<br><br>3. Mild to<br>Moderate   | Industry Funded<br>Rand – 2/2<br>Blind – 1/2<br>Withdraw – 1/1                  | MMSE(2 <sup>0</sup> )                  | 1.43<br>(0.98, 1.88)                                                                                           | GBS<br>total score<br><br>GBS-I<br><br>GDS (2 <sup>0</sup> ) | -6.20<br>(-12.02,-0.38)<br><br>-3.70<br>(-6.75,-0.65)<br><br>(p=0.047)                                          | NPI (2 <sup>0</sup> )<br><br>(p > 0.05) | A-PDS (2 <sup>0</sup> )     | (p<0.05)                                             |                        |

| Author<br>Year       | 1. Population<br><br>2. Interventions<br>and treatment<br>duration (TP)<br><br>3.<br>#<br>Randomized/#<br>completing trial             | 1. Criteria<br>for Diagnosis<br><br>2. Diagnosis<br><br>3. Disease<br>Severity | Study Quality<br><br>Funding Source<br>Randomization<br>Blinding<br>Withdrawals | Cognitive<br>Function             |                                                  | Global<br>Assessment    |                        | Behavior/<br>Mood        |                        | Quality of Life/<br>ADL                  |                        |
|----------------------|----------------------------------------------------------------------------------------------------------------------------------------|--------------------------------------------------------------------------------|---------------------------------------------------------------------------------|-----------------------------------|--------------------------------------------------|-------------------------|------------------------|--------------------------|------------------------|------------------------------------------|------------------------|
|                      |                                                                                                                                        |                                                                                |                                                                                 | Measure                           | Result<br>Effect Size*                           | Measure                 | Result<br>Effect Size* | Measure                  | Result<br>Effect Size* | Measure                                  | Result<br>Effect Size* |
| Winblad<br>2006 (33) | 1. Institution<br>dwelling, mean<br>age 84.9 years<br>and 24% male<br><br>2. Donepezil<br>5mg - 10mg<br>TP: 6 months<br><br>3. 249/194 | 1. DSM IV<br>NINCDS<br><br>2. Alzheimer's<br>disease<br><br>3. Severe          | Industry Funded<br><br>Rand – 2/2<br>Blind – 1/2<br>Withdraw – 1/1              | SIB<br><br>MMSE (2 <sup>0</sup> ) | 4.50<br>(1.17, 7.83)<br><br>1.00<br>(0.17, 1.83) | CGI-I (2 <sup>0</sup> ) | -0.30<br>(-3.49, 2.89) | NPI<br>(2 <sup>0</sup> ) | -1.70<br>(-4.75, 1.35) | ADCS-<br>ADL-severe<br>(2 <sup>0</sup> ) | 1.40<br>(0.14, 2.66)   |

#### Donepezil versus Galantamine

|                       |                                                                                                                                                                                                        |                                                                                                                                                                   |                                                                    |                                                                                                 |                                                                                                          |    |                                       |       |                       |
|-----------------------|--------------------------------------------------------------------------------------------------------------------------------------------------------------------------------------------------------|-------------------------------------------------------------------------------------------------------------------------------------------------------------------|--------------------------------------------------------------------|-------------------------------------------------------------------------------------------------|----------------------------------------------------------------------------------------------------------|----|---------------------------------------|-------|-----------------------|
| Wilcock,<br>2003 (34) | 1. Mean age<br>73.5 years,<br>37.9% male,<br>100% white<br>(galantamine)<br>and<br>98.9% white<br>(donepezil)<br><br>2. Donepezil<br>10mg vs.<br>Galantamine<br>24mg<br>TP: 52 weeks<br><br>3. 188/149 | 1. NINCDS-<br>ADRDA<br><br>2. Alzheimer's<br>Disease,<br>Dementia<br>Alzheimer's<br>type, Senile<br>dementia of<br>the<br>Alzheimer's<br>type.<br><br>3. Probable | Industry Funded<br><br>Rand – 1/2<br>Blind – 1/2<br>Withdraw – 1/1 | MMSE (2 <sup>0</sup> )<br><br>MMSE ≥ 0<br>at 12 months<br><br>ADAS-<br>cog/11 (2 <sup>0</sup> ) | -1.68<br>(-2.82,-0.54)<br><br>DPZ =<br>32.5%<br>GAL =<br>55.2%<br>(p<0.005)<br><br>1.21<br>(-0.97, 3.39) | NT | NPI (2 <sup>0</sup> )<br><br>(p>0.05) | BrADL | 0.21<br>(-1.80, 2.22) |
|-----------------------|--------------------------------------------------------------------------------------------------------------------------------------------------------------------------------------------------------|-------------------------------------------------------------------------------------------------------------------------------------------------------------------|--------------------------------------------------------------------|-------------------------------------------------------------------------------------------------|----------------------------------------------------------------------------------------------------------|----|---------------------------------------|-------|-----------------------|

| Author<br>Year                 | 1. Population<br><br>2. Interventions<br>and treatment<br>duration (TP)<br><br>3.<br>#<br>Randomized/#<br>completing trial                                                                                          | 1. Criteria<br>for Diagnosis<br><br>2. Diagnosis<br><br>3. Disease<br>Severity     | Study Quality<br><br>Funding Source<br>Randomization<br>Blinding<br>Withdrawals | Cognitive<br>Function |                        | Global<br>Assessment                      |                        | Behavior/<br>Mood |                        | Quality of Life/<br>ADL |                        |
|--------------------------------|---------------------------------------------------------------------------------------------------------------------------------------------------------------------------------------------------------------------|------------------------------------------------------------------------------------|---------------------------------------------------------------------------------|-----------------------|------------------------|-------------------------------------------|------------------------|-------------------|------------------------|-------------------------|------------------------|
|                                |                                                                                                                                                                                                                     |                                                                                    |                                                                                 | Measure               | Result<br>Effect Size* | Measure                                   | Result<br>Effect Size* | Measure           | Result<br>Effect Size* | Measure                 | Result<br>Effect Size* |
| Ancoli-<br>Israel 2005<br>(35) | 1. Community<br>dwelling, mean<br>age 77.5 years,<br>68.6 years<br>(caregivers),<br>38% male and<br>81% white<br><br>2. Donepezil (5<br>– 10mg/d) vs.<br>Galantamine (8-<br>16mg/d)<br>TP: 52 weeks<br><br>3. 63/54 | 1. NINCDS-<br>ADRDA<br><br>2. Alzheimer's<br>disease<br><br>3. Mild to<br>moderate | Industry Funded<br>Rand – 1/2<br>Blind – 1/2<br>Withdraw – 1/1                  | NT                    |                        | CIBIC+<br>RR<br>improved or<br>stabilized | 0.86<br>(0.74, 1.01)   | NT                |                        | NT                      |                        |

| Author<br>Year                                              | 1. Population<br><br>2. Interventions<br>and treatment<br>duration (TP)<br><br>3.<br>#<br>Randomized/#<br>completing trial                   | 1. Criteria<br>for Diagnosis<br><br>2. Diagnosis<br><br>3. Disease<br>Severity | Study Quality<br><br>Funding Source<br>Randomization<br>Blinding<br>Withdrawals | Cognitive<br>Function  |                           | Global<br>Assessment            |                         | Behavior/<br>Mood     |                          | Quality of Life/<br>ADL       |                         |
|-------------------------------------------------------------|----------------------------------------------------------------------------------------------------------------------------------------------|--------------------------------------------------------------------------------|---------------------------------------------------------------------------------|------------------------|---------------------------|---------------------------------|-------------------------|-----------------------|--------------------------|-------------------------------|-------------------------|
|                                                             |                                                                                                                                              |                                                                                |                                                                                 | Measure                | Result<br>Effect Size*    | Measure                         | Result<br>Effect Size*  | Measure               | Result<br>Effect Size*   | Measure                       | Result<br>Effect Size*  |
| <b>Donepezil versus Rivastigmine</b>                        |                                                                                                                                              |                                                                                |                                                                                 |                        |                           |                                 |                         |                       |                          |                               |                         |
| Bullock<br>2005 (37)                                        | 1. Mean age<br>75.9 years,                                                                                                                   | 1. NINCDS-<br>ADRDA                                                            | Industry Funded<br>Rand – 2/2                                                   | SIB                    | -0.61<br>(-3.66, 2.44)    | GDS (2 <sup>0</sup> )           | 0.11<br>(0.00, 0.22)    | NPI (2 <sup>0</sup> ) | 0.54<br>(-1.68, 2.76)    | ADCS-ADL<br>(2 <sup>0</sup> ) | -2.08<br>(-4.58, 0.42)  |
| Bullock<br>2006 (36)                                        | 31.3% male and<br>98.8% white<br><br>2. Donepezil (5 -<br>10mg/d) vs.<br>Rivastigmine<br>(3 - 12mg/d)<br><br>TP: 24 months<br><br>3. 998/578 | 2. Alzheimer's<br>disease<br><br>3. Moderate to<br>moderately<br>severe        | Blind – 2/2<br>Withdraw – 1/1                                                   | MMSE (2 <sup>0</sup> ) | -0.50<br>(-1.33, 0.33)    |                                 |                         |                       |                          |                               |                         |
| <b>Galantamine versus Placebo (except otherwise stated)</b> |                                                                                                                                              |                                                                                |                                                                                 |                        |                           |                                 |                         |                       |                          |                               |                         |
| Brodsky<br>2005 (39)                                        | 1. Mean age<br>76.5 years and                                                                                                                | 1. NINCDS-<br>ADRDA                                                            | Industry Funded<br>Rand – 2/2                                                   | ADAS-cog               | A: -2.50<br>(-3.39,-1.61) | CIBIC+ (2 <sup>0</sup> )        | A: 1.08<br>(0.94, 1.23) | NPI (2 <sup>0</sup> ) | A: -1.20<br>(-2.97,0.57) | ADCS-ADL<br>(2 <sup>0</sup> ) | A: 2.40<br>(0.80,4.00)  |
| Dunbar<br>2006 (49)                                         | 36% male<br><br>2.<br>A: Galantamine<br>PRC<br>B: Galantamine<br>TP: 26 weeks<br>3. 971/768                                                  | 2. Alzheimer's<br>disease<br><br>3. Probable<br>(mild to<br>moderate)          | Blind – 2/2<br>Withdraw – 1/1                                                   |                        | B: -2.80<br>(-3.76,-1.84) | RR<br>improved or<br>stabilized | B: 1.10<br>0.97, 1.25)  |                       | B: -1.50<br>(-3.38,0.38) |                               | B: 1.40<br>(-0.22,3.02) |

| Author<br>Year           | 1. Population<br><br>2. Interventions<br>and treatment<br>duration (TP)<br><br>3.<br>#<br>Randomized/#<br>completing trial                                           | 1. Criteria<br>for Diagnosis<br><br>2. Diagnosis<br><br>3. Disease<br>Severity                                                                                                        | Study Quality<br><br>Funding Source<br>Randomization<br>Blinding<br>Withdrawals | Cognitive<br>Function                                                 |                                                                           | Global<br>Assessment                    |                        | Behavior/<br>Mood     |                        | Quality of Life/<br>ADL |                        |
|--------------------------|----------------------------------------------------------------------------------------------------------------------------------------------------------------------|---------------------------------------------------------------------------------------------------------------------------------------------------------------------------------------|---------------------------------------------------------------------------------|-----------------------------------------------------------------------|---------------------------------------------------------------------------|-----------------------------------------|------------------------|-----------------------|------------------------|-------------------------|------------------------|
|                          |                                                                                                                                                                      |                                                                                                                                                                                       |                                                                                 | Measure                                                               | Result<br>Effect Size*                                                    | Measure                                 | Result<br>Effect Size* | Measure               | Result<br>Effect Size* | Measure                 | Result<br>Effect Size* |
| Bullock<br>2004 (45)     | 1. Mean 76.5<br>years and 48.3%<br>male<br>2. Galantamine<br>(24 mg/d)<br>TP: 6 months<br>double blind and<br>then 6 months<br>open-label<br>extension<br>3. 285/238 | 1. NINCDS-<br>ADRDA<br>NINCDS-<br>AIREN<br>2. Alzheimer's<br>Disease and<br>Cerebrovascul<br>ar disease<br>3. Probable<br>vascular<br>dementia,<br>possible<br>Alzheimer's<br>disease | Not reported<br>Rand – 1/2<br>Blind – 2/2<br>Withdraw – 1/1                     | ADAS-<br>cog/11<br>(at 6 months<br>– end of<br>double-blind<br>phase) | -3.10<br>(-4.59,-1.61)                                                    | NT                                      | NPI                    | N/A                   | DAD                    | N/A                     |                        |
| Erkinjuntti<br>2002 (43) | 1. Mean age<br>75.1 years<br>(range: 40 – 90<br>years), 53%<br>male and 99.9%<br>white<br>2. Galantamine<br>(24 mg/d)<br>TP: 6 months<br><br>3. 592/457              | 1. NINDS<br>NINCDS<br>2. Vascular<br>dementia and<br>Alzheimer's<br>disease<br>3. Probable                                                                                            | Partially Funded by<br>industry<br>Rand – 2/2<br>Blind – 2/2<br>Withdraw – 1/1  | ADAS-<br>cog/11<br><br>ADAS-cog<br>≥ 4 point<br>change                | -2.70<br>(-3.95,-1.45)<br><br>PB = 22.2%<br>GAL =<br>35.3%<br>(p = 0.005) | CIBIC+- RR<br>improved or<br>stabilized | 1.25<br>(1.08, 1.45)   | NPI (2 <sup>0</sup> ) | -2.20<br>(-4.83, 0.43) | DAD (2 <sup>0</sup> )   | 4.60<br>(1.50, 7.70)   |

| Author<br>Year       | 1. Population<br><br>2. Interventions<br>and treatment<br>duration (TP)<br><br>3.<br>#<br>Randomized/#<br>completing trial                                 | 1. Criteria<br>for Diagnosis<br><br>2. Diagnosis<br><br>3. Disease<br>Severity                                        | Study Quality<br><br>Funding Source<br>Randomization<br>Blinding<br>Withdrawals | Cognitive<br>Function                                                          |                                                                     | Global<br>Assessment                      |                                                    | Behavior/<br>Mood                 |                                              | Quality of Life/<br>ADL |                        |
|----------------------|------------------------------------------------------------------------------------------------------------------------------------------------------------|-----------------------------------------------------------------------------------------------------------------------|---------------------------------------------------------------------------------|--------------------------------------------------------------------------------|---------------------------------------------------------------------|-------------------------------------------|----------------------------------------------------|-----------------------------------|----------------------------------------------|-------------------------|------------------------|
|                      |                                                                                                                                                            |                                                                                                                       |                                                                                 | Measure                                                                        | Result<br>Effect Size*                                              | Measure                                   | Result<br>Effect Size*                             | Measure                           | Result<br>Effect Size*                       | Measure                 | Result<br>Effect Size* |
| Koontz 2005<br>(47)  | 1. Community<br>dwelling, mean<br>age 71 years,<br>100% male<br><br>2. Galantamine<br>(4 -12 mg/d)<br>TP: 16 weeks<br><br>3. 19/10                         | 1. Peterson<br>Criteria<br>MMSE.26<br>living<br>independently<br><br>2. Mild<br>cognitive<br>impairment<br><br>3. N/A | Industry Funded<br><br>Rand – 1/2<br>Blind – 1/2<br>Withdraw – 1/1              | CANTAB-<br>SOC<br><br>CANTAB-<br>PRM<br><br>CVLT<br>(immediate<br>recall only) | 2.80<br>(p=0.023)<br><br>1256<br>(p=0.001)<br><br>1256<br>(p=0.050) | NT                                        | NT                                                 | FAQ                               | (p=0.029)                                    |                         |                        |
| Raskind<br>2000 (41) | 1. mean age 75.4<br>years, 38% male<br>and 91.5% white<br><br>2.<br>A: Galantamine<br>24mg/d<br>B: Galantamine<br>32mg/d<br>TP: 6 months<br><br>3. 636/438 | 1. NINCDS<br><br>2. Alzheimer's<br>Disease<br><br>3. Mild to<br>moderate                                              | Industry Funded<br><br>Rand – 2/2<br>Blind – 2/2<br>Withdraw – 2/1              | ADAS-<br>cog/11                                                                | A: -0.10<br>(-1.23,1.03)<br>B: -3.40<br>(-4.63,-2.17)               | CIBIC+<br>RR<br>improved or<br>stabilized | A: 1.29 (1.11,<br>1.50)<br>B: 1.22 (1.04,<br>1.43) | ADAS-<br>cog/13 (2 <sup>0</sup> ) | A: 4.5<br>(p< 0.001)<br>B: 4.1<br>(p< 0.001) | DAD (2 <sup>0</sup> )   | (p>0.05)               |

| Author<br>Year        | 1. Population<br><br>2. Interventions<br>and treatment<br>duration (TP)<br><br>3.<br>#<br>Randomized/#<br>completing trial | 1. Criteria<br>for Diagnosis<br><br>2. Diagnosis<br><br>3. Disease<br>Severity         | Study Quality<br><br>Funding Source<br>Randomization<br>Blinding<br>Withdrawals | Cognitive<br>Function                                                                         |                                                                                                  | Global<br>Assessment                      |                        | Behavior/<br>Mood                                   |                                                   | Quality of Life/<br>ADL |                        |
|-----------------------|----------------------------------------------------------------------------------------------------------------------------|----------------------------------------------------------------------------------------|---------------------------------------------------------------------------------|-----------------------------------------------------------------------------------------------|--------------------------------------------------------------------------------------------------|-------------------------------------------|------------------------|-----------------------------------------------------|---------------------------------------------------|-------------------------|------------------------|
|                       |                                                                                                                            |                                                                                        |                                                                                 | Measure                                                                                       | Result<br>Effect Size*                                                                           | Measure                                   | Result<br>Effect Size* | Measure                                             | Result<br>Effect Size*                            | Measure                 | Result<br>Effect Size* |
| Rockwood<br>2001 (40) | 1. mean age 74.9<br>years, 44% male<br><br>2. Galantamine<br>24 -32mg<br>TP: 3 months<br><br>3. 386/288                    | 1. NINCDS<br><br>2. Alzheimer's<br>Disease<br><br>3. Probable<br>(mild to<br>moderate) | Industry Funded<br>Rand – 2/2<br>Blind – 2/2<br>Withdraw – 1/1                  | ADAS-<br>cog11<br><br>ADAS-<br>cog13 (2 <sup>0</sup> )<br><br>ADAS-cog<br>≥ 4 point<br>change | -1.70<br>(-2.79,-0.61)<br><br>-1.90<br>(-3.15,-0.65)<br><br>PB = 22%,<br>GAL 24-32<br>mg = 28.3% | CIBIC+<br>RR<br>improved or<br>stabilized | 1.29<br>(1.11, 1.50)   | NPI (2 <sup>0</sup> )<br><br>-0.80<br>(-2.67, 1.07) | DAD (2 <sup>0</sup> )<br><br>4.80<br>(2.05, 7.55) |                         |                        |

| Author<br>Year      | 1. Population<br><br>2. Interventions<br>and treatment<br>duration (TP)<br><br>3.<br>#<br>Randomized/#<br>completing trial                                                             | 1. Criteria<br>for Diagnosis<br><br>2. Diagnosis<br><br>3. Disease<br>Severity         | Study Quality<br><br>Funding Source<br>Randomization<br>Blinding<br>Withdrawals | Cognitive<br>Function                            |                                                                                     | Global<br>Assessment                      |                                                                            | Behavior/<br>Mood     |                                                                                  | Quality of Life/<br>ADL       |                                                                             |
|---------------------|----------------------------------------------------------------------------------------------------------------------------------------------------------------------------------------|----------------------------------------------------------------------------------------|---------------------------------------------------------------------------------|--------------------------------------------------|-------------------------------------------------------------------------------------|-------------------------------------------|----------------------------------------------------------------------------|-----------------------|----------------------------------------------------------------------------------|-------------------------------|-----------------------------------------------------------------------------|
|                     |                                                                                                                                                                                        |                                                                                        |                                                                                 | Measure                                          | Result<br>Effect Size*                                                              | Measure                                   | Result<br>Effect Size*                                                     | Measure               | Result<br>Effect Size*                                                           | Measure                       | Result<br>Effect Size*                                                      |
| Tariot<br>2000 (39) | 1. Mean age<br>76.8 years. 36%<br>male and 93%<br>white<br><br>2.<br>A: Galantamine<br>8mg/d<br>B: Galantamine<br>16mg/d<br>C: Galantamine<br>24mg/d<br>TP: 5 months<br><br>3. 978/679 | 1. NINCDS<br><br>2. Alzheimer's<br>Disease<br><br>3. Probable<br>(mild to<br>moderate) | Not reported<br>Rand – 2/2<br>Blind – 2/2<br>Withdraw – 1/1                     | ADAS-Cog                                         | A: -1.30<br>(-2.57,-0.03)<br>B: -3.10<br>(-4.13,-2.07)<br>C: -3.10<br>(-4.18,-2.02) | CIBIC+<br>RR<br>improved<br>or stabilized | A: 1.08<br>(0.88,1.33)<br>B: 1.35<br>(1.16,1.57)<br>C: 1.31<br>(1.12,1.52) | NPI (2 <sup>0</sup> ) | A: 0.30<br>(-2.09,2.69)<br>B: -2.10<br>(-4.04,-0.16)<br>C: -2.00<br>(-4.08,0.08) | ADCS/ADL<br>(2 <sup>0</sup> ) | A: 0.60<br>(-1.36,2.56)<br>B: 3.10<br>(1.57,4.63)<br>C: 2.30<br>(0.64,3.96) |
|                     |                                                                                                                                                                                        |                                                                                        |                                                                                 | ADAS-cog<br>≥ 4 point<br>change(2 <sup>0</sup> ) | PB = 19.6%<br>*GAL 16mg<br>= 35.6%<br>*GAL 24mg<br>= 37%<br>(*p<0.01)               |                                           |                                                                            |                       |                                                                                  |                               |                                                                             |
|                     |                                                                                                                                                                                        |                                                                                        |                                                                                 | ADAS-cog<br>≥ 7 point<br>change(2 <sup>0</sup> ) | PB = 7.6%<br>+GAL 16mg<br>= 15.9%<br>+GAL 24mg<br>= 22.3%<br>(+ p<0.001)            |                                           |                                                                            |                       |                                                                                  |                               |                                                                             |

| Author<br>Year                                | 1. Population<br><br>2. Interventions<br>and treatment<br>duration (TP)<br><br>3.<br>#<br>Randomized/#<br>completing trial                                                                      | 1. Criteria<br>for Diagnosis<br><br>2. Diagnosis<br><br>3. Disease<br>Severity        | Study Quality<br><br>Funding Source<br>Randomization<br>Blinding<br>Withdrawals | Cognitive<br>Function                            |                                                                                       | Global<br>Assessment                      |                                                                               | Behavior/<br>Mood |                        | Quality of Life/<br>ADL                                                       |                        |
|-----------------------------------------------|-------------------------------------------------------------------------------------------------------------------------------------------------------------------------------------------------|---------------------------------------------------------------------------------------|---------------------------------------------------------------------------------|--------------------------------------------------|---------------------------------------------------------------------------------------|-------------------------------------------|-------------------------------------------------------------------------------|-------------------|------------------------|-------------------------------------------------------------------------------|------------------------|
|                                               |                                                                                                                                                                                                 |                                                                                       |                                                                                 | Measure                                          | Result<br>Effect Size*                                                                | Measure                                   | Result<br>Effect Size*                                                        | Measure           | Result<br>Effect Size* | Measure                                                                       | Result<br>Effect Size* |
| Wilcock<br>2000 (42)<br>Wilcock<br>2001 (109) | 1. Mean age<br>72.2 years, 37%<br>male<br>2.<br>A: Galantamine<br>24mg/d<br>B: Galantamine<br>32mg/d<br>TP: 6 months<br><br>3. 653/525                                                          | 1. NINCDS<br><br>2. Alzheimer's<br>Disease<br><br>3. mild to<br>moderate              | Non-industry<br>Funding source<br>Rand -2/2<br>Blind - 2/2<br>Withdraw - 1/1    | ADAS-cog                                         | A: -2.90<br>(-4.00, -1.80)<br>B: -3.20<br>(-4.36, -2.04)                              | CIBIC                                     | A: 1.08<br>(0.70, 1.65)<br>B: 1.49<br>(1.00, 2.22)                            | NT                | DAD (2 <sup>0</sup> )  | A: 2.80<br>(-0.11, 5.71)<br>B: 3.50<br>(0.52, 6.48)                           |                        |
|                                               |                                                                                                                                                                                                 |                                                                                       |                                                                                 | ADAS-cog<br>≥ 4 point<br>change(2 <sup>0</sup> ) | PB = 15 %,<br>+GAL 24mg<br>= 29%<br>+GAL 32mg<br>= 32%<br>(+p < 0.001)                | CIBIC+<br>RR<br>improved<br>or stabilized | A: 1.24<br>(1.04, 1.48)<br>B: 1.32<br>(1.11, 1.57)                            |                   |                        |                                                                               |                        |
| Wilkinson<br>2001 (44)                        | 1. Community<br>dwelling, mean<br>age 73.8 years,<br>42% male<br>2.<br>A: Galantamine<br>(18mg/d)<br>B: Galantamine<br>(24mg/d)<br>C: Galantamine<br>(36mg/d)<br>TP: 12 weeks<br><br>3. 285/206 | 1. NINCDS<br>DSM-III-R<br><br>2. Alzheimer's<br>Disease<br><br>3. mild to<br>moderate | Industry Funded<br>Rand - 2/2<br>Blind - 2/2<br>Withdraw - 1/1                  | ADAS-Cog                                         | A: -1.70<br>(-3.64, 0.24)<br>B: -3.00<br>(-5.23, -0.77)<br>C: -2.30<br>(-4.24, -0.36) | CGIC(2 <sup>0</sup> )                     | A: 1.32<br>(0.84, 2.08)<br>B: 1.02<br>(0.59, 1.77)<br>C: 1.15<br>(0.67, 1.98) | NT                | PDS-1(2 <sup>0</sup> ) | A: 0.72<br>(0.41, 1.27)<br>B: 0.42<br>(0.18, 0.98)<br>C: 0.88<br>(0.47, 1.63) |                        |

| Author<br>Year         | 1. Population<br><br>2. Interventions<br>and treatment<br>duration (TP)<br><br>3.<br>#<br>Randomized/#<br>completing trial | 1. Criteria<br>for Diagnosis<br><br>2. Diagnosis<br><br>3. Disease<br>Severity | Study Quality<br><br>Funding Source<br>Randomization<br>Blinding<br>Withdrawals | Cognitive<br>Function |                        | Global<br>Assessment |                        | Behavior/<br>Mood |                        | Quality of Life/<br>ADL |                        |
|------------------------|----------------------------------------------------------------------------------------------------------------------------|--------------------------------------------------------------------------------|---------------------------------------------------------------------------------|-----------------------|------------------------|----------------------|------------------------|-------------------|------------------------|-------------------------|------------------------|
|                        |                                                                                                                            |                                                                                |                                                                                 | Measure               | Result<br>Effect Size* | Measure              | Result<br>Effect Size* | Measure           | Result<br>Effect Size* | Measure                 | Result<br>Effect Size* |
| Wilkinson<br>2005 (48) | 1. Mean age 75<br>years<br><br>2. Galantamine<br>TP: 4 weeks,<br>48 wk open label<br><br>3. 285/206                        | 1. NR<br><br>2. Alzheimer's<br>Disease<br><br>3. mild to<br>moderate           | Industry Funded<br>Rand – 1/2<br>Blind – 1/2<br>Withdraw – 1/1                  | ADAS-cog              | (p>0.05)               |                      |                        |                   |                        |                         |                        |

| Author<br>Year | 1. Population<br>2. Interventions<br>and treatment<br>duration (TP)<br>3.<br>#<br>Randomized/#<br>completing trial | 1. Criteria<br>for Diagnosis<br>2. Diagnosis<br>3. Disease<br>Severity | Study Quality<br>Funding Source<br>Randomization<br>Blinding<br>Withdrawals | Cognitive<br>Function |                        | Global<br>Assessment |                        | Behavior/<br>Mood |                        | Quality of Life/<br>ADL |                        |
|----------------|--------------------------------------------------------------------------------------------------------------------|------------------------------------------------------------------------|-----------------------------------------------------------------------------|-----------------------|------------------------|----------------------|------------------------|-------------------|------------------------|-------------------------|------------------------|
|                |                                                                                                                    |                                                                        |                                                                             | Measure               | Result<br>Effect Size* | Measure              | Result<br>Effect Size* | Measure           | Result<br>Effect Size* | Measure                 | Result<br>Effect Size* |

**Rivastigmine versus Placebo (except otherwise stated)**

|                   |                                                                                                                                                                             |                                                                                                     |                                                               |                                                 |                                                                |                                     |                                                    |                  |                                                    |                  |                                                     |
|-------------------|-----------------------------------------------------------------------------------------------------------------------------------------------------------------------------|-----------------------------------------------------------------------------------------------------|---------------------------------------------------------------|-------------------------------------------------|----------------------------------------------------------------|-------------------------------------|----------------------------------------------------|------------------|----------------------------------------------------|------------------|-----------------------------------------------------|
| Agid<br>1998 (50) | 1. mean age 69.4<br>years (range: 50<br>– 90 years) and<br>44% male<br><br>2.<br>A: Rivastigmine<br>(6mg/d)<br>B: Rivastigmine<br>(4mg/d)<br>TP: 13 weeks<br><br>3. 402/357 | 1. DSM-III-R<br>NINCDS<br><br>2. Alzheimer's<br>Disease<br><br>3. Probable<br>(mild to<br>moderate) | Industry Funded<br>Rand –2/2<br>Blind – 2/2<br>Withdraw – 2/1 | MMSE                                            | A: 0.30<br>(-0.46, 1.06)<br>B: 0.00<br>(-0.77, 0.77)           | CGIC<br>RR<br>Successful<br>outcome | A: 1.43<br>(1.00, 2.04)<br>B: 1.05<br>(0.71, 1.56) | NOSGER<br>- Mood | A: 0.00<br>(-0.74,0.74)<br>B: 0.10<br>(-0.67,0.87) | NOSGER -<br>IADL | A: -0.50(-<br>1.40,0.40)<br>B: 0.20(-<br>0.66,1.06) |
|                   |                                                                                                                                                                             |                                                                                                     |                                                               | Digit<br>Symbol<br>Substitution                 | A: 2.30<br>(0.30, 4.30)<br>B: 1.20<br>(-0.37, 2.77)            |                                     |                                                    |                  |                                                    |                  |                                                     |
|                   |                                                                                                                                                                             |                                                                                                     |                                                               | Trail<br>Making                                 | A: -7.80<br>(-18.58,<br>2.98)<br>B: -2.10<br>(-11.03,<br>6.83) |                                     |                                                    |                  |                                                    |                  |                                                     |
|                   |                                                                                                                                                                             |                                                                                                     |                                                               | FULD<br>Object-<br>Memory<br>Evaluation<br>(TS) | A: 1.60<br>(0.04, 3.16)<br>B: 1.30<br>(-0.22, 2.82)            |                                     |                                                    |                  |                                                    |                  |                                                     |
|                   |                                                                                                                                                                             |                                                                                                     |                                                               | FULD<br>Object-<br>Memory<br>Evaluation<br>(TR) | A: 1.00<br>(-0.12, 2.12)<br>B: 0.70<br>(-0.46, 1.86)           |                                     |                                                    |                  |                                                    |                  |                                                     |

| Author<br>Year                                                                                                                                                                | 1. Population<br><br>2. Interventions<br>and treatment<br>duration (TP)<br><br>3.<br>#<br>Randomized/#<br>completing trial                                                                          | 1. Criteria<br>for Diagnosis<br><br>2. Diagnosis<br><br>3. Disease<br>Severity               | Study Quality<br><br>Funding Source<br>Randomization<br>Blinding<br>Withdrawals | Cognitive<br>Function                             |                                                               | Global<br>Assessment     |                                                        | Behavior/<br>Mood      |                                                                | Quality of Life/<br>ADL |                                                    |
|-------------------------------------------------------------------------------------------------------------------------------------------------------------------------------|-----------------------------------------------------------------------------------------------------------------------------------------------------------------------------------------------------|----------------------------------------------------------------------------------------------|---------------------------------------------------------------------------------|---------------------------------------------------|---------------------------------------------------------------|--------------------------|--------------------------------------------------------|------------------------|----------------------------------------------------------------|-------------------------|----------------------------------------------------|
|                                                                                                                                                                               |                                                                                                                                                                                                     |                                                                                              |                                                                                 | Measure                                           | Result<br>Effect Size*                                        | Measure                  | Result<br>Effect Size*                                 | Measure                | Result<br>Effect Size*                                         | Measure                 | Result<br>Effect Size*                             |
| Ballard 2005<br>(57)                                                                                                                                                          | 1. Institutions<br>Dwelling, mean<br>age 83.8 years,<br>20% male<br><br>2.<br>A: Rivastigmine<br>B: Rivastigmine<br>vs. Quetiapine<br>TP: 26 weeks<br><br>3. 93/74                                  | 1. NINCDS-<br>ADRDA<br><br>2. Alzheimer's<br>Disease<br><br>3. moderate to<br>severe         | Industry provided<br>supplies<br>Rand – 2/2<br>Blind – 1/2<br>Withdraw – 1/1    | SIB (2 <sup>0</sup> )                             | A: -6.40<br>(-19.43,<br>6.63)<br>B: 8.20<br>(-4.88,<br>21.28) |                          | NT                                                     | Agitation<br>Inventory | A: -1.80<br>(-11.71,<br>8.11)<br>B: -2.70<br>(-11.99,<br>6.59) |                         | NT                                                 |
| Corey-<br>Bloom<br>1998 (51)<br><u>Auxiliary:</u><br>Farlow<br>2001 (110)<br>Farlow<br>2000 (111)<br>Kumar<br>2000 (112)<br>Del Ser<br>2000 (113)<br>Doraiswamy<br>2002 (114) | 1. Mean age<br>74.5 years,<br>(range: 45 – 89<br>years), 39%<br>male and 95%<br>White<br><br>2.<br>A: Rivastigmine<br>(6 -12 mg)<br>B: Rivastigmine<br>(1 - 4 mg)<br>TP: 26 weeks<br><br>3. 699/545 | 1. DSM-IV<br>NINCDS<br><br>2. Alzheimer's<br>Disease<br><br>3. mild to<br>moderate<br>severe | Industry Funded<br>Rand – 2/2<br>Blind – 2/2<br>Withdraw – 2/1                  | ADAS-Cog                                          | A: -3.78<br>(-4.87,-2.69)<br>B:-1.73<br>(-2.82,-0.64)         | CIBIC+                   | A: -0.29<br>(-0.52,-0.06)<br>B: -0.26<br>(-0.49,-0.03) | NT                     |                                                                | PDS (2 <sup>0</sup> )   | A: 3.38<br>(1.51,5.25)<br>B: -0.29<br>(-2.16,1.58) |
|                                                                                                                                                                               |                                                                                                                                                                                                     |                                                                                              |                                                                                 | ADAS-cog<br>≥ 4 point<br>change (2 <sup>0</sup> ) | RIV 6-12mg<br>=25%                                            | CIBIC+<br>RR<br>improved | A: 1.51<br>(1.03, 2.19)<br>B: 1.57<br>(1.09, 2.28)     |                        |                                                                |                         |                                                    |
|                                                                                                                                                                               |                                                                                                                                                                                                     |                                                                                              |                                                                                 |                                                   |                                                               | GDS (2 <sup>0</sup> )    | A: 0.19<br>(0.06,0.32)<br>B: 0.16<br>(0.03,0.29)       |                        |                                                                |                         |                                                    |

| Author<br>Year                                                                                                                          | 1. Population<br>2. Interventions<br>and treatment<br>duration (TP)<br>3.<br>#<br>Randomized/#<br>completing trial   | 1. Criteria<br>for Diagnosis<br>2. Diagnosis<br>3. Disease<br>Severity                                        | Study Quality<br>Funding Source<br>Randomization<br>Blinding<br>Withdrawals | Cognitive<br>Function                                                  |                                                                                                         | Global<br>Assessment                                                |                                                                                                                                                                          | Behavior/<br>Mood                                                                  |                                                                                                                                                                          | Quality of Life/<br>ADL |                                                        |
|-----------------------------------------------------------------------------------------------------------------------------------------|----------------------------------------------------------------------------------------------------------------------|---------------------------------------------------------------------------------------------------------------|-----------------------------------------------------------------------------|------------------------------------------------------------------------|---------------------------------------------------------------------------------------------------------|---------------------------------------------------------------------|--------------------------------------------------------------------------------------------------------------------------------------------------------------------------|------------------------------------------------------------------------------------|--------------------------------------------------------------------------------------------------------------------------------------------------------------------------|-------------------------|--------------------------------------------------------|
|                                                                                                                                         |                                                                                                                      |                                                                                                               |                                                                             | Measure                                                                | Result<br>Effect Size*                                                                                  | Measure                                                             | Result<br>Effect Size*                                                                                                                                                   | Measure                                                                            | Result<br>Effect Size*                                                                                                                                                   | Measure                 | Result<br>Effect Size*                                 |
| Emre 2005<br>(52)<br><u>Auxillary:</u><br>Wesnes<br>2005 (115)<br>Dujardin<br>2006 (108)<br>Tekin 2006<br>(117)<br>Willan 2006<br>(118) | 1. Mean age<br>72.7y, 64.9%<br>male, 99.6%<br>White<br>2. Rivastigmine<br>(3 -12 mg/d)<br>TP: 24 weeks<br>3. 541/410 | 1. DSM-IV<br>2. Dementia<br>associated<br>with<br>Parkinson's<br>disease<br>3. mild to<br>moderate-<br>severe | Industry Funded<br>Rand – 2/2<br>Blind – 2/2<br>Withdraw – 1/1              | ADAS-cog<br>MMSE (2 <sup>0</sup> )<br>DRS (2 <sup>0</sup> )            | -2.80<br>(-4.26,-1.34)<br>1.00<br>(0.33,1.67)<br>(P<0.05)                                               | ADCS-<br>CGIC                                                       | -0.50<br>(-0.77,-0.23)                                                                                                                                                   | NPI (2 <sup>0</sup> )<br>-2.00<br>(-3.91,-0.09)                                    | ADCS-ADL<br>(2 <sup>0</sup> )<br>2.50<br>(0.43,4.57)                                                                                                                     |                         |                                                        |
| Forette<br>1999 (11)                                                                                                                    | 1. Mean age<br>70.6 years<br>2.<br>A: Rivastigmine<br>b.i.d<br>B: Rivastigmine<br>t.i.d<br>TP: 18 weeks<br>3. 114/85 | 1. NINCDS<br>DSM-III-R<br>2. Alzheimer's<br>Disease<br>3. Mild to<br>moderate                                 | Industry Funded<br>Rand – 1/2<br>Blind – 1/2<br>Withdraw – 1/1              | ADAS-Cog<br>Wechsler<br>logical<br>memory test<br>ADAS-cog<br>improved | A: -4.80<br>(-6.04,-3.56)<br>B: -1.60<br>(-2.78,-0.42)<br>A vs B<br>1.7<br>(p=0.012)<br>A:<br>(p=0.054) | NOSGER<br>Self-care<br>NOSGER<br>Memory<br>CIBIC+<br>RR<br>Improved | A: -0.10<br>(-1.49, 1.29)<br>B: -0.30<br>(-1.74, 1.14)<br>A: -2.00<br>(-4.04, 0.04)<br>B: -2.30<br>(-4.25, -0.35)<br>A: 3.58<br>(1.19, 10.74)<br>B: 2.26<br>(0.72, 7.15) | NOSGER<br>Disturbing<br>behavior<br>NOSGER<br>Mood<br>NOSGER<br>Social<br>behavior | A: -0.40<br>(-2.04, 1.24)<br>B: -0.80<br>(-2.69, 1.09)<br>A: 1.30<br>(-0.59, 3.19)<br>B: 0.20<br>(-1.73, 2.13)<br>A: -0.30<br>(-2.13, 1.53)<br>B: -1.40<br>(-3.46, 0.66) | IADL                    | A: -0.40<br>(-2.60, 1.80)<br>B: -1.50<br>(-3.85, 0.85) |

| Author<br>Year       | 1. Population<br><br>2. Interventions<br>and treatment<br>duration (TP)<br><br>3.<br>#<br>Randomized/#<br>completing trial                                                                                                                                                                        | 1. Criteria<br>for Diagnosis<br><br>2. Diagnosis<br><br>3. Disease<br>Severity                 | Study Quality<br><br>Funding Source<br>Randomization<br>Blinding<br>Withdrawals | Cognitive<br>Function             |                                                                                                        | Global<br>Assessment |                         | Behavior/<br>Mood |                        | Quality of Life/<br>ADL |                        |
|----------------------|---------------------------------------------------------------------------------------------------------------------------------------------------------------------------------------------------------------------------------------------------------------------------------------------------|------------------------------------------------------------------------------------------------|---------------------------------------------------------------------------------|-----------------------------------|--------------------------------------------------------------------------------------------------------|----------------------|-------------------------|-------------------|------------------------|-------------------------|------------------------|
|                      |                                                                                                                                                                                                                                                                                                   |                                                                                                |                                                                                 | Measure                           | Result<br>Effect Size*                                                                                 | Measure              | Result<br>Effect Size*  | Measure           | Result<br>Effect Size* | Measure                 | Result<br>Effect Size* |
| Karaman<br>2005 (53) | 1. History of<br>cognitive decline<br>that was gradual<br>in onset and<br>progressive over<br>a period of at<br>least 6 months<br>MMSE score of<br>14. Mean age<br>73.8 years<br>(range: 60 - 90<br>years), 45.5%<br>male<br><br>2. Rivastigmine<br>(3 -12 mg/d)<br>TP: 12 months<br><br>3. 44/41 | 1. NINCDS-<br>ADRDA<br>DSM IV<br><br>2. Alzheimer's<br>Disease<br><br>3. Moderate to<br>severe | Not reported<br>Rand – 1/2<br>Blind – 1/2<br>Withdraw – 1/1                     | ADAS-cog                          | -5.27<br>(-5.73,-4.81)                                                                                 | CIBIC+               | -0.18<br>(-0.28, -0.08) | NT                | PDS                    | 3.52<br>(3.40, 3.64)    |                        |
|                      |                                                                                                                                                                                                                                                                                                   |                                                                                                |                                                                                 | ADAS-cog<br>Decline ≥ 4<br>points | PB = 45%<br>RIV =<br>18.3%                                                                             | GDS                  | 4.30<br>(3.81, 4.79)    |                   | DAD                    | -1.00<br>(-1.06,-0.94)  |                        |
|                      |                                                                                                                                                                                                                                                                                                   |                                                                                                |                                                                                 | MMSE                              | -0.35<br>(-0.46,-0.24)<br>PB =<br>deteriorated<br>by 1.2 points<br>RIV =<br>improved by<br>0.20 points | ADCS-ADL             | 0.24<br>(0.14,0.34)     |                   |                        |                         |                        |

| Author<br>Year       | 1. Population<br><br>2. Interventions<br>and treatment<br>duration (TP)<br><br>3.<br>#<br>Randomized/#<br>completing trial                        | 1. Criteria<br>for Diagnosis<br><br>2. Diagnosis<br><br>3. Disease<br>Severity               | Study Quality<br><br>Funding Source<br>Randomization<br>Blinding<br>Withdrawals | Cognitive<br>Function                                                 |                        | Global<br>Assessment                                              |                        | Behavior/<br>Mood                                                                          |                        | Quality of Life/<br>ADL |                        |
|----------------------|---------------------------------------------------------------------------------------------------------------------------------------------------|----------------------------------------------------------------------------------------------|---------------------------------------------------------------------------------|-----------------------------------------------------------------------|------------------------|-------------------------------------------------------------------|------------------------|--------------------------------------------------------------------------------------------|------------------------|-------------------------|------------------------|
|                      |                                                                                                                                                   |                                                                                              |                                                                                 | Measure                                                               | Result<br>Effect Size* | Measure                                                           | Result<br>Effect Size* | Measure                                                                                    | Result<br>Effect Size* | Measure                 | Result<br>Effect Size* |
| McKeith<br>2000 (54) | 1. Mean age<br>73.9 years<br>(range: 57 – 87<br>years) and 56%<br>male<br><br>2. Rivastigmine<br>(3.0 - 12 mg/d)<br>TP: 20 weeks<br><br>3. 102/92 | 1. Consensus<br>criteria<br><br>2. Lewy-body<br>dementia<br><br>3. mild to<br>moderate       | Industry Funded<br><br>Rand – 2/2<br>Blind – 2/2<br>Withdraw – 1/1              | MMSE (2 <sup>0</sup> )<br>1.4<br>(p=0.072)<br><br>CCASSS<br>(p< 0.05) |                        | CGC+ (2 <sup>0</sup> )<br>(p > 0.05)                              |                        | NPI-4<br>1.70<br>(-1.12, 4.52)<br><br>NPI-10<br>(2 <sup>0</sup> )<br>3.80<br>(-1.65, 9.25) |                        |                         | NT                     |
| Potkin 2001<br>(55)  | 1. Mean age<br>75.9 years,<br>(range: 64 – 89<br>years)<br><br>2. Rivastigmine<br>(3, 6 or 9 mg/d)<br>TP: 26 weeks<br><br>3. 27/27                | 1. DSM-IV<br>NINCDS<br><br>2. Alzheimer's<br>Disease<br><br>3. mild to<br>moderate<br>severe | Partially Funded by<br>industry<br>Rand – 1/2<br>Blind – 2/2<br>Withdraw – 0/1  | Picture<br>Naming task<br>(p > 0.05)                                  |                        | CIBIC+<br>RR<br>improved or<br>stabilized<br>2.63<br>(0.79, 8.70) |                        | NT                                                                                         |                        |                         | NT                     |

| Author<br>Year                                                                             | 1. Population<br>2. Interventions<br>and treatment<br>duration (TP)<br>3.<br>#<br>Randomized/#<br>completing trial                                       | 1. Criteria<br>for Diagnosis<br>2. Diagnosis<br>3. Disease<br>Severity               | Study Quality<br>Funding Source<br>Randomization<br>Blinding<br>Withdrawals | Cognitive<br>Function           |                                                                                        | Global<br>Assessment                              |                                                                                                           | Behavior/<br>Mood |                        | Quality of Life/<br>ADL                             |                        |
|--------------------------------------------------------------------------------------------|----------------------------------------------------------------------------------------------------------------------------------------------------------|--------------------------------------------------------------------------------------|-----------------------------------------------------------------------------|---------------------------------|----------------------------------------------------------------------------------------|---------------------------------------------------|-----------------------------------------------------------------------------------------------------------|-------------------|------------------------|-----------------------------------------------------|------------------------|
|                                                                                            |                                                                                                                                                          |                                                                                      |                                                                             | Measure                         | Result<br>Effect Size*                                                                 | Measure                                           | Result<br>Effect Size*                                                                                    | Measure           | Result<br>Effect Size* | Measure                                             | Result<br>Effect Size* |
| Rösler<br>1999 (56)                                                                        | 1. Community<br>dwelling.<br>Comorbidity:<br>diabetes,<br>hypertension,<br>arthritis. Mean<br>age 72 years<br>(range: 45 – 95<br>years), and 41%<br>male | 1. DSM-IV<br>NINCDS<br>2. Alzheimer's<br>Disease<br>3. mild to<br>moderate<br>severe | Industry Funded<br>Rand – 2/2<br>Blind – 2/2<br>Withdraw – 1/1              | ADAS- Cog                       | A: -1.60<br>(-2.84,-0.36)<br>B: 0.03<br>(-1.22, 1.28)                                  | CIBIC+                                            | A: -0.47<br>(-0.73,-0.21)<br>B: -0.14<br>(-0.39,0.11)                                                     | NT                | PDS (2 <sup>0</sup> )  | A: 2.23<br>(-0.16,4.62)<br>B: -1.19<br>(-3.59,1.21) |                        |
| <u>Auxiliary:</u><br>Rösler<br>2001 (119)<br>Rösler<br>1998 (120)<br>Del Ser<br>2000 (113) |                                                                                                                                                          |                                                                                      |                                                                             | ADAS-cog<br>≥ 4 point<br>change | PB = 16%<br>+RIV 1-4<br>mg/d = 15%<br>*RIV 6-12<br>mg/d = 24%<br>(+p>0.05;<br>*p<0.01) | CIBIC+<br>RR<br>improved<br>GDS (2 <sup>0</sup> ) | A: 1.83<br>(1.34, 2.50)<br>B: 1.48<br>(1.07, 2.05)<br>A: 0.20<br>(0.06 ,0.34)<br>B: 0.04<br>(-0.10, 0.18) |                   |                        |                                                     |                        |
| Farlow<br>2000 (111)<br>Doraiswamy<br>2002 (114)                                           | 2.<br>A: Rivastigmine<br>(6-12mg/d)<br>B: Rivastigmine<br>(1-4mg/d)<br>TP: 14 weeks<br><br>3. 725/581                                                    |                                                                                      |                                                                             | MMSE (2 <sup>0</sup> )          | A: 0.68<br>(0.04, 1.32)<br>B: -0.15<br>(-0.79, 0.49)                                   |                                                   |                                                                                                           |                   |                        |                                                     |                        |

Tacrine versus Placebo (except otherwise stated)

| Author<br>Year                                                                                                                                                                                                                                                  | 1. Population<br><br>2. Interventions<br>and treatment<br>duration (TP)<br><br>3.<br>#<br>Randomized/#<br>completing trial                                                                | 1. Criteria<br>for Diagnosis<br><br>2. Diagnosis<br><br>3. Disease<br>Severity         | Study Quality<br><br>Funding Source<br>Randomization<br>Blinding<br>Withdrawals | Cognitive<br>Function                                                                                              |                                                                                                                                                                                                                                                   | Global<br>Assessment                                                                 |                                                                                                                                                                                                                                                                                                                                                                      | Behavior/<br>Mood                                                                                                            |                                        | Quality of Life/<br>ADL |                        |
|-----------------------------------------------------------------------------------------------------------------------------------------------------------------------------------------------------------------------------------------------------------------|-------------------------------------------------------------------------------------------------------------------------------------------------------------------------------------------|----------------------------------------------------------------------------------------|---------------------------------------------------------------------------------|--------------------------------------------------------------------------------------------------------------------|---------------------------------------------------------------------------------------------------------------------------------------------------------------------------------------------------------------------------------------------------|--------------------------------------------------------------------------------------|----------------------------------------------------------------------------------------------------------------------------------------------------------------------------------------------------------------------------------------------------------------------------------------------------------------------------------------------------------------------|------------------------------------------------------------------------------------------------------------------------------|----------------------------------------|-------------------------|------------------------|
|                                                                                                                                                                                                                                                                 |                                                                                                                                                                                           |                                                                                        |                                                                                 | Measure                                                                                                            | Result<br>Effect Size*                                                                                                                                                                                                                            | Measure                                                                              | Result<br>Effect Size*                                                                                                                                                                                                                                                                                                                                               | Measure                                                                                                                      | Result<br>Effect Size*                 | Measure                 | Result<br>Effect Size* |
| Knapp<br>1994b (58)<br>Auxiliary:<br>Farlow<br>1998 (121)<br>Gracon<br>1996 (122)<br>Henke<br>1997 (123)<br>Knapp<br>1994a (124)<br>Knopman<br>1996 (125)<br>Raskind<br>1997 (126)<br>Schneider<br>1997 (127)<br>Schneider<br>1996 (128)<br>Smith<br>1996 (129) | 1. mean age 72.8<br>years (range: 49<br>– 95 years) and<br>48% male<br><br>2.<br>A: Tacrine<br>80mg/d<br>B: Tacrine<br>120mg/d<br>C: Tacrine<br>160mg/d<br>TP: 30 weeks<br><br>3. 663/279 | 1. NINCDS<br><br>2. Alzheimer's<br>Disease<br><br>3. Probable<br>(mild to<br>moderate) | Industry Funded<br>Rand – 2/2<br>Blind – 2/2<br>Withdraw – 0/1                  | ADAS-Cog<br><br>ADAS-cog<br>≥ 4 point<br>change<br><br>MMSE (2 <sup>0</sup> )<br><br>MMSE<br>≥ 3.0 point<br>change | A: -1.40<br>(-3.50, 0.70)<br>B: -2.00<br>(-3.50,-0.50)<br>C: -2.20<br>(-3.50,-0.80)<br><br>PB= 25%<br>TA 160 mg<br>= 40%<br><br>A: 0.60<br>(-0.60,1.70)<br>B: 0.40<br>(-0.40,1.20)<br>C: 0.90<br>(0.10,1.60)<br><br>P = 20%<br>TA 160 mg<br>= 42% | CIBI<br><br>FCCA<br><br>GDS (2 <sup>0</sup> )<br><br>ADAS-Total<br>(2 <sup>0</sup> ) | A: -0.10<br>(-0.40, 0.10)<br>B: -0.20<br>(-0.40, -0.01)<br>C: -0.20<br>(-0.40, -0.01)<br><br>A: -0.30<br>(-0.80,0.10)<br>B: -0.40<br>(-0.80,-0.10)<br>C: -0.60<br>(-0.90,-0.30)<br><br>A: 0.07<br>(-0.10,0.30)<br>B: -0.05<br>(-0.20,0.08)<br>C: -0.20<br>(-0.30,-0.04)<br><br>A: -2.40<br>(-5.20, 0.40)<br>B: -2.20<br>(-4.20, -0.30)<br>C: -3.00<br>(-4.80, -1.10) | ADAS-<br>Noncog<br>(2 <sup>0</sup> )<br><br>A: -0.80<br>(-2.20,0.60)<br>B: -0.30<br>(-1.30,0.70)<br>C: -0.70<br>(-1.60,0.20) | IADL (2 <sup>0</sup> )<br><br>(p>0.05) |                         |                        |

| Author<br>Year      | 1. Population<br>2. Interventions<br>and treatment<br>duration (TP)<br>3.<br>#<br>Randomized/#<br>completing trial                                                | 1. Criteria<br>for Diagnosis<br>2. Diagnosis<br>3. Disease<br>Severity                              | Study Quality<br>Funding Source<br>Randomization<br>Blinding<br>Withdrawals   | Cognitive<br>Function                                     |                        | Global<br>Assessment |                        | Behavior/<br>Mood  |                        | Quality of Life/<br>ADL |                        |
|---------------------|-------------------------------------------------------------------------------------------------------------------------------------------------------------------|-----------------------------------------------------------------------------------------------------|-------------------------------------------------------------------------------|-----------------------------------------------------------|------------------------|----------------------|------------------------|--------------------|------------------------|-------------------------|------------------------|
|                     |                                                                                                                                                                   |                                                                                                     |                                                                               | Measure                                                   | Result<br>Effect Size* | Measure              | Result<br>Effect Size* | Measure            | Result<br>Effect Size* | Measure                 | Result<br>Effect Size* |
| Maltby<br>1994 (59) | 1. Community<br>dwelling, mean<br>age 68.8 years<br>(range: 52 – 84<br>years) and 51%<br>male<br><br>2. Tacrine (25-<br>100 mg/d)<br>TP: 36 weeks<br><br>3. 41/32 | 1. NINCDS<br>DSM-III-R<br><br>2. Alzheimer's<br>Disease<br><br>3. Probable<br>(mild to<br>moderate) | Non-industry<br>Funding source<br>Rand – 1/2<br>Blind – 1/2<br>Withdraw – 1/1 | MMSE                                                      | -0.10<br>(p=0.944)     | NT                   | LPRS                   | -0.50<br>(p=0.638) | NT                     |                         |                        |
|                     |                                                                                                                                                                   |                                                                                                     |                                                                               | <u>Memory</u><br><u>Tests:</u><br>Verbal<br>(total words) | 4.50<br>(p=0.200)      |                      |                        |                    |                        |                         |                        |
|                     |                                                                                                                                                                   |                                                                                                     |                                                                               | Visual<br>(total<br>objects)                              | 1.50<br>(p=0.359)      |                      |                        |                    |                        |                         |                        |
|                     |                                                                                                                                                                   |                                                                                                     |                                                                               | Digit<br>forward<br>(6 months)                            | 0.50<br>(p=0.723)      |                      |                        |                    |                        |                         |                        |
|                     |                                                                                                                                                                   |                                                                                                     |                                                                               | Verbal<br>fluency<br>(6 months)                           | 3.80<br>(p=0.198)      |                      |                        |                    |                        |                         |                        |
|                     |                                                                                                                                                                   |                                                                                                     |                                                                               | Face<br>recognition<br>(6 months)                         | -0.10<br>(p=0.651)     |                      |                        |                    |                        |                         |                        |

| Author<br>Year        | 1. Population<br><br>2. Interventions<br>and treatment<br>duration (TP)<br><br>3.<br>#<br>Randomized/#<br>completing trial               | 1. Criteria<br>for Diagnosis<br><br>2. Diagnosis<br><br>3. Disease<br>Severity         | Study Quality<br><br>Funding Source<br>Randomization<br>Blinding<br>Withdrawals | Cognitive<br>Function  |                        | Global<br>Assessment                      |                        | Behavior/<br>Mood     |                        | Quality of Life/<br>ADL |                        |
|-----------------------|------------------------------------------------------------------------------------------------------------------------------------------|----------------------------------------------------------------------------------------|---------------------------------------------------------------------------------|------------------------|------------------------|-------------------------------------------|------------------------|-----------------------|------------------------|-------------------------|------------------------|
|                       |                                                                                                                                          |                                                                                        |                                                                                 | Measure                | Result<br>Effect Size* | Measure                                   | Result<br>Effect Size* | Measure               | Result<br>Effect Size* | Measure                 | Result<br>Effect Size* |
| Prentice<br>1996 (60) | 1. Mean age<br>68.0 years, 13%<br>male<br><br>2. Tacrine (40-<br>80mg/d)<br>TP: 13 weeks<br><br>3. 23/19                                 | 1. DSM-III-R<br>NINCDS<br><br>2. Alzheimer's<br>Disease<br><br>3. Probable             | Partially Funded by<br>industry.<br>Rand – 1/2<br>Blind – 1/2<br>Withdraw – 1/1 | MMSE                   | 0.10<br>(p>0.05)       | NT                                        |                        | RPT                   | -2.00<br>(p>0.05)      |                         | NT                     |
| Wong<br>1999 (62)     | 1. Mean age<br>73.8 years,<br>(range: 52 – 94<br>years), 50%<br>male<br><br>2. Tacrine (30-<br>120mg/d)<br>TP: 30 weeks<br><br>3. 100/56 | 1. NINCDS<br><br>2. Alzheimer's<br>Disease<br><br>3. Probable<br>(mild to<br>moderate) | Industry provided<br>supplies<br>Rand – 1/2<br>Blind – 1/2<br>Withdraw – 1/1    | CASI                   | 2.75<br>(-1.31, 6.81)  | CGIC<br>investigator<br>(2 <sup>0</sup> ) | -0.03<br>(-0.49, 0.43) | ADS (2 <sup>0</sup> ) | 0.34<br>(-1.63, 2.31)  |                         | NT                     |
|                       |                                                                                                                                          |                                                                                        |                                                                                 | IQCODE                 | 0.18<br>(-0.14, 0.50)  |                                           |                        |                       |                        |                         |                        |
|                       |                                                                                                                                          |                                                                                        |                                                                                 | MMSE (2 <sup>0</sup> ) | 1.29<br>(-0.20, 2.78)  |                                           |                        |                       |                        |                         |                        |

| Author<br>Year                               | 1. Population<br><br>2. Interventions<br>and treatment<br>duration (TP)<br><br>3.<br>#<br>Randomized/#<br>completing trial                             | 1. Criteria<br>for Diagnosis<br><br>2. Diagnosis<br><br>3. Disease<br>Severity          | Study Quality<br><br>Funding Source<br>Randomization<br>Blinding<br>Withdrawals                                 | Cognitive<br>Function             |                                          | Global<br>Assessment                                                                          |                                                                            | Behavior/<br>Mood                                   |                        | Quality of Life/<br>ADL |                           |
|----------------------------------------------|--------------------------------------------------------------------------------------------------------------------------------------------------------|-----------------------------------------------------------------------------------------|-----------------------------------------------------------------------------------------------------------------|-----------------------------------|------------------------------------------|-----------------------------------------------------------------------------------------------|----------------------------------------------------------------------------|-----------------------------------------------------|------------------------|-------------------------|---------------------------|
|                                              |                                                                                                                                                        |                                                                                         |                                                                                                                 | Measure                           | Result<br>Effect Size*                   | Measure                                                                                       | Result<br>Effect Size*                                                     | Measure                                             | Result<br>Effect Size* | Measure                 | Result<br>Effect Size*    |
| Wood<br>1994 (63)                            | 1. Community<br>dwelling, mean<br>age 75 years,<br>54% male<br><br>2. Tacrine (20 –<br>120 mg/d)<br>TP: 12 weeks<br><br>3. 154/131                     | 1. NINCDS<br><br>2. Alzheimer's<br>Disease<br><br>3. mild to<br>moderate                | Industry Funded<br>Rand –1/2<br>Blind – 1/2<br>Withdraw – 1/1                                                   | MMSE<br><br>AMTS(2 <sup>0</sup> ) | 0.38<br>(p=0.55)<br><br>0.34<br>(p=0.18) | CGRS<br><br>RGRS(2 <sup>0</sup> )<br><br>Blessed(2 <sup>0</sup> )<br><br>GBS(2 <sup>0</sup> ) | (p=0.012)<br><br>(p=0.03)<br><br>-0.16<br>(p=0.60)<br><br>-2.6<br>(p=0.53) | ADAS-non<br>cog (2 <sup>0</sup> )<br><br>(p > 0.05) |                        |                         | NT                        |
| Weinstein<br>1991 (61)<br>Goad<br>1991 (130) | 1. Community<br>Dwelling, mean<br>age 74.6 years<br>(range: 56-79<br>years), 50%<br>male<br><br>2. Tacrine 100<br>mg/d<br>TP: 12 weeks<br><br>3. 13/12 | 1. DSM-III-R<br><br>2. Alzheimer's<br>Disease<br><br>3. Probable<br>(mild to<br>severe) | Non-Industry<br>Funding source,<br>industry provided<br>supplies<br>Rand – 2/2<br>Blind – 2/2<br>Withdraw – 1/1 | CAMCOG                            | 0.00<br>(-6.40, 6.40)                    |                                                                                               | NT                                                                         |                                                     | NT                     | IDDD                    | 3.33<br>(-7.49,<br>14.16) |

| Author<br>Year               | 1. Population<br><br>2. Interventions<br>and treatment<br>duration (TP)<br><br>3.<br>#<br>Randomized/#<br>completing trial                                                                         | 1. Criteria<br>for Diagnosis<br><br>2. Diagnosis<br><br>3. Disease<br>Severity                                                   | Study Quality                                                                      | Cognitive<br>Function         |                        | Global<br>Assessment  |                        | Behavior/<br>Mood                 |                        | Quality of Life/<br>ADL          |                        |
|------------------------------|----------------------------------------------------------------------------------------------------------------------------------------------------------------------------------------------------|----------------------------------------------------------------------------------------------------------------------------------|------------------------------------------------------------------------------------|-------------------------------|------------------------|-----------------------|------------------------|-----------------------------------|------------------------|----------------------------------|------------------------|
|                              |                                                                                                                                                                                                    |                                                                                                                                  | Funding Source<br>Randomization<br>Blinding<br>Withdrawals                         | Measure                       | Result<br>Effect Size* | Measure               | Result<br>Effect Size* | Measure                           | Result<br>Effect Size* | Measure                          | Result<br>Effect Size* |
| <b>Tacrine versus others</b> |                                                                                                                                                                                                    |                                                                                                                                  |                                                                                    |                               |                        |                       |                        |                                   |                        |                                  |                        |
| Gutzmann<br>2002 (64)        | 1. Community<br>dwelling, mean<br>age 71.2 years<br>(range: 44-90<br>years), 36%<br>male, 100%<br>white<br><br>2. Tacrine<br>160mg/d vs.<br>Idebenone 360<br>mg/d<br>TP: 60 weeks<br><br>3. 203/44 | 1. NINCDS<br>DSM-III-R<br><br>2. Alzheimer's<br>Disease,<br>Progressive<br>degenerated<br>dementia<br><br>3. mild to<br>moderate | Partially Funded by<br>industry<br><br>Rand – 1/2<br>Blind – 1/2<br>Withdraw – 1/1 | ADAS-cog<br>(2 <sup>0</sup> ) | -2.29<br>(p > 0.05)    | CGI (2 <sup>0</sup> ) | 0.13<br>(p > 0.05)     | ADAS-non<br>cog (2 <sup>0</sup> ) | -1.71<br>(p > 0.05)    | NOSGER-<br>IADL(2 <sup>0</sup> ) | -0.53<br>(p > 0.05)    |

| Author<br>Year               | 1. Population<br>2. Interventions<br>and treatment<br>duration (TP)<br>3.<br>#<br>Randomized/#<br>completing trial  | 1. Criteria<br>for Diagnosis<br>2. Diagnosis<br>3. Disease<br>Severity  | Study Quality<br>Funding Source<br>Randomization<br>Blinding<br>Withdrawals | Cognitive<br>Function  |                        | Global<br>Assessment                    |                        | Behavior/<br>Mood           |                        | Quality of Life/<br>ADL |                        |
|------------------------------|---------------------------------------------------------------------------------------------------------------------|-------------------------------------------------------------------------|-----------------------------------------------------------------------------|------------------------|------------------------|-----------------------------------------|------------------------|-----------------------------|------------------------|-------------------------|------------------------|
|                              |                                                                                                                     |                                                                         |                                                                             | Measure                | Result<br>Effect Size* | Measure                                 | Result<br>Effect Size* | Measure                     | Result<br>Effect Size* | Measure                 | Result<br>Effect Size* |
| <b>Memantine vs. placebo</b> |                                                                                                                     |                                                                         |                                                                             |                        |                        |                                         |                        |                             |                        |                         |                        |
| Orgogozo<br>2002 (65)        | 1. Mean age<br>76.4 years, 53%<br>male, 100%<br>white<br>2. Memantine (5<br>- 20mg/d)<br>TP: 28 weeks<br>3. 321/234 | 1. NINDS-<br>AIREN<br>2. Vascular<br>dementia<br>3. mild to<br>moderate | Industry Funded<br>Rand – 1/2<br>Blind – 1/2<br>Withdraw –1/1               | ADAS-Cog               | -2.85<br>(-4.39,-1.31) | CIBIC+                                  | -0.29<br>(-0.66, 0.08) | NOSGER<br>(2 <sup>0</sup> ) | -0.53<br>(-3.91, 2.85) |                         | NT                     |
|                              |                                                                                                                     |                                                                         |                                                                             | MMSE (2 <sup>0</sup> ) | 1.23<br>(0.23, 2.23)   | RR<br>improved or<br>stabilized         | 1.15<br>(0.91, 1.45)   |                             |                        |                         |                        |
|                              |                                                                                                                     |                                                                         |                                                                             |                        |                        | CGI-C<br>Clinician<br>(2 <sup>0</sup> ) | -0.27<br>(-0.56, 0.02) |                             |                        |                         |                        |
|                              |                                                                                                                     |                                                                         |                                                                             |                        |                        | RR<br>improved                          | 1.40<br>(1.03, 1.90)   |                             |                        |                         |                        |
|                              |                                                                                                                     |                                                                         |                                                                             |                        |                        | CGI-C<br>Caregiver<br>(2 <sup>0</sup> ) | -0.30<br>(-0.63, 0.03) |                             |                        |                         |                        |
|                              |                                                                                                                     |                                                                         |                                                                             |                        |                        | RR<br>improved                          | 1.14<br>(0.84,1.55)    |                             |                        |                         |                        |
|                              |                                                                                                                     |                                                                         |                                                                             |                        |                        | GBS (2 <sup>0</sup> )                   | -3.74<br>(-7.82, 0.34) |                             |                        |                         |                        |

| Author<br>Year                              | 1. Population<br><br>2. Interventions<br>and treatment<br>duration (TP)<br><br>3.<br>#<br>Randomized/#<br>completing trial   | 1. Criteria<br>for Diagnosis<br><br>2. Diagnosis<br><br>3. Disease<br>Severity                  | Study Quality<br><br>Funding Source<br>Randomization<br>Blinding<br>Withdrawals | Cognitive<br>Function |                        | Global<br>Assessment  |                         | Behavior/<br>Mood     |                        | Quality of Life/<br>ADL       |                        |
|---------------------------------------------|------------------------------------------------------------------------------------------------------------------------------|-------------------------------------------------------------------------------------------------|---------------------------------------------------------------------------------|-----------------------|------------------------|-----------------------|-------------------------|-----------------------|------------------------|-------------------------------|------------------------|
|                                             |                                                                                                                              |                                                                                                 |                                                                                 | Measure               | Result<br>Effect Size* | Measure               | Result<br>Effect Size*  | Measure               | Result<br>Effect Size* | Measure                       | Result<br>Effect Size* |
| Peskind<br>2006 (69)                        | 1. Mean age<br>77.5, 41.2%<br>male, 93.8 %<br>White<br><br>2. Memantine<br>20mg/d<br>TP: 24 weeks<br><br>3. 403/394          | 1. NINDS-<br>ADRDA<br><br>2. Alzheimer's<br>Disease<br><br>3. Probable<br>(mild to<br>moderate) | Industry Funded<br>Rand – 2/2<br>Blind – 2/2<br>Withdraw – 1/1                  | ADAS-Cog              | -1.00<br>(-2.72, 0.72) | CIBIC+                | -0.28<br>(-3.16, 2.60)  | NPI (2 <sup>0</sup> ) | -2.10<br>(-5.59, 1.39) | ADCS-ADL<br>(2 <sup>0</sup> ) | 0.00<br>(-2.31, 2.31)  |
| Reisburg<br>2003 (68)<br>Wimo<br>2003 (131) | 1. Community<br>dwelling, mean<br>age 76 years,<br>33% male,<br><br>2. Memantine<br>20mg/d<br>TP: 28 weeks<br><br>3. 252/181 | 1. NINDS-<br>ADRDA<br>DSM IV<br><br>2. Alzheimer's<br>Disease<br><br>3. Moderate to<br>severe   | Industry Funded<br>Rand – 2/2<br>Blind – 2/2<br>Withdraw – 1/1                  | SIB(2 <sup>0</sup> )  | 6.10<br>(2.99, 9.21)   | CIBIC+                | -0.30<br>(-0.58, -0.02) | NPI (2 <sup>0</sup> ) | -3.30<br>(-7.33, 0.73) | ADCS-ADL                      | 2.10<br>(0.46, 3.74)   |
|                                             |                                                                                                                              |                                                                                                 |                                                                                 | MMSE(2 <sup>0</sup> ) | 0.70<br>(0.02,1.38)    | GDS (2 <sup>0</sup> ) | -0.10<br>(-0.22,0.02)   |                       |                        | FAST(2 <sup>0</sup> )         | -0.40<br>(-0.73,-0.07) |

| Author<br>Year                                   | 1. Population<br><br>2. Interventions<br>and treatment<br>duration (TP)<br><br>3.<br>#<br>Randomized/#<br>completing trial                                        | 1. Criteria<br>for Diagnosis<br><br>2. Diagnosis<br><br>3. Disease<br>Severity               | Study Quality<br><br>Funding Source<br>Randomization<br>Blinding<br>Withdrawals | Cognitive<br>Function                     |                                                                | Global<br>Assessment            |                         | Behavior/<br>Mood           |                        | Quality of Life/<br>ADL |                        |
|--------------------------------------------------|-------------------------------------------------------------------------------------------------------------------------------------------------------------------|----------------------------------------------------------------------------------------------|---------------------------------------------------------------------------------|-------------------------------------------|----------------------------------------------------------------|---------------------------------|-------------------------|-----------------------------|------------------------|-------------------------|------------------------|
|                                                  |                                                                                                                                                                   |                                                                                              |                                                                                 | Measure                                   | Result<br>Effect Size*                                         | Measure                         | Result<br>Effect Size*  | Measure                     | Result<br>Effect Size* | Measure                 | Result<br>Effect Size* |
| Tariot<br>2004 (70)                              | 1. Mean age<br>75.5 years,<br>35.0% male                                                                                                                          | 1. NINDS-<br>ADRDA                                                                           | Industry Funded<br>Rand – 2/2<br>Blind – 2/2                                    | SIB                                       | 3.40<br>(1.51, 5.29)                                           | CIBIC+<br>(2 <sup>0</sup> )     | -0.25<br>(-0.46, -0.04) | NPI(2 <sup>0</sup> )        | -3.80<br>(-6.53,-1.07) | ADCS-ADL                | 1.40<br>(0.00, 2.80)   |
| Van Dick<br>2005 (132)<br>Cummings<br>2006 (133) | 2. Memantine<br>(5-20mg/d)<br>TP: 24 weeks<br><br>3. 404/322                                                                                                      | 2. Alzheimer's<br>Disease<br><br>3. Moderate to<br>severe                                    | Withdraw – 1/1                                                                  | SIB<br>≥8 points<br><br>SIB ≥12<br>points | ARR (%)<br>8.5<br>(1.5, 15.5)<br><br>ARR (%)<br>5.0 (0.3, 9.7) | RR<br>improved or<br>stabilized | 1.23<br>(1.00, 1.50)    |                             |                        |                         |                        |
| Wilcock<br>2002 (66)                             | 1. Community<br>Dwelling, mean<br>age 77.4 years,<br>(range: 54 – 97<br>years), 51%<br>male<br><br>2. Memantine<br>(5 - 20mg/d)<br>TP: 28 weeks<br><br>3. 579/464 | 1. DSM-III-R<br>NINDS-<br>AIREN<br><br>2. Vascular<br>dementia<br><br>3. mild to<br>moderate | Industry provided<br>supplies<br>Rand – 2/2<br>Blind – 2/2<br>Withdraw – 0/1    | ADAS-Cog                                  | -1.75<br>(-3.02, 0.48)                                         | CGI-C                           | (p=0.1103)              | NOSGER<br>(2 <sup>0</sup> ) | -1.13<br>(-3.57, 1.31) |                         | NT                     |
|                                                  |                                                                                                                                                                   |                                                                                              |                                                                                 | MMSE (2 <sup>0</sup> )                    | -0.27<br>(-1.06, 0.52)                                         | GBS (2 <sup>0</sup> )           | -0.83<br>(-3.78, 2.12)  |                             |                        |                         |                        |

| Author<br>Year       | 1. Population<br><br>2. Interventions<br>and treatment<br>duration (TP)<br><br>3.<br>#<br>Randomized/#<br>completing trial                                             | 1. Criteria<br>for Diagnosis<br><br>2. Diagnosis<br><br>3. Disease<br>Severity                                                                             | Study Quality                                              | Cognitive<br>Function |                        | Global<br>Assessment    |                        | Behavior/<br>Mood |                        | Quality of Life/<br>ADL                 |                        |
|----------------------|------------------------------------------------------------------------------------------------------------------------------------------------------------------------|------------------------------------------------------------------------------------------------------------------------------------------------------------|------------------------------------------------------------|-----------------------|------------------------|-------------------------|------------------------|-------------------|------------------------|-----------------------------------------|------------------------|
|                      |                                                                                                                                                                        |                                                                                                                                                            | Funding Source<br>Randomization<br>Blinding<br>Withdrawals | Measure               | Result<br>Effect Size* | Measure                 | Result<br>Effect Size* | Measure           | Result<br>Effect Size* | Measure                                 | Result<br>Effect Size* |
| Winblad<br>1999 (67) | 1. Institution<br>dwelling, mean<br>age 71.2 years,<br>(range: 60 – 80<br>years) and 42%<br>male<br><br>2. Memantine<br>(5 - 10mg/d)<br>TP: 12 weeks<br><br>3. 166/151 | 1. DSM-III-R<br>2. Dementia<br>of<br>Alzheimer's<br>type, Vascular<br>dementia,<br>progressive<br>degenerative<br>dementia<br><br>3. Moderate to<br>severe | Not reported<br>Rand –1/2<br>Blind – 1/2<br>Withdraw – 1/1 | MMSE                  | NR                     | CGI-C<br>RR<br>improved | 1.62<br>(1.24, 2.12)   |                   |                        | BGP<br>(Care<br>Dependency<br>subscale) | -2.00<br>(-5.65, 1.65) |

\*Effect size estimate included 95% confidence interval OR end point mean difference. 2<sup>0</sup> = secondary outcome; ABS=Adaptive Behaviour Scale; ADAS-Cog=Alzheimer's Dementia Assessment Scale-Cognitive Component; ADCD-ADL=Alzheimer's Disease Co-operative Study-Activities of Daily Living; ADCS- ARR = adjusted relative risk; CGIC=Alzheimer's Disease Co-operative Study-Clinical, Global Impression of Change; ADFACS=Alzheimer's Disease Functional Assessment and Change Scale; AMTS=Abbreviated Mental Test Score; BADLS=Bristol Activities of Daily Living Scale; CAMTOT=CAMCOG Total Score, Cambridge Cognitive Schedule; CANTAB-PRM=Cambridge Automated Neuropsychological Test Assessment Battery-Patterns of Recognition; CANTAB-SOC=Cambridge Automated Neuropsychological Test Assessment Battery-Stockings of Cambridge; CASI=Cognitive Abilities Screening Instrument; CDR-SB=Clinical Dementia Rating-Sum of Boxes; CGI=Clinical Global Impression; CGIC=Clinical Global Impression of Change; CIBI=Clinician's Interview-Based Impression; CIBIC+=Clinician's Interview Based Impression of Change; CVLT=California Verbal Learning Test; DAD=Disability Assessment for Dementia; DMR=Dementia Rating Scale for Mentally Retarded; DPZ=Donepezil; DRS-Memory=Dementia Rating Scale-Memory; DRS-total=Dementia Rating Scale-total; DSM IV=Diagnostic and Statistical Manual of Mental Disorders, Edition IV; DSM-III-R=Diagnostic and Statistical Manual of Mental Disorders, Edition III-R; FAQ=Functional Activities Questionnaire; FCCA=Final Comprehensive Consensus Assessment; FRS=Functional Rating Scale test; GBS-1=Gottfries-Brane-Steen; GDS=Global Deterioration Scale; Ham-D=Hamilton Depression Rating Scale; HVLT-R=Hopkins Verbal Learning Test; IADL=Instrumental Activities of Daily Living Scale; IDDD=Interview for Deterioration in Daily Living Activities in Dementia-complex task; IQCODE=Informant Questionnaire on Cognitive Decline in the Elderly; MMSE=Mini-mental Status Exam; N/A=Not available; NINCDS=National Institute of Neurological and Communicative Disorders and Stroke; NINCDS-ADRDA=National Institute of Neurological and Communicative Disorders and Stroke-Alzheimer's Disease and Related Disorders Association; NINCDS-AIREN=National Institute of Neurological and Communicative Disorders and Stroke-Association Internationale pour la Recherche et l'Enseignement en Neurosciences; NINDS-AIREN=National Institute of Neurological Disorders and Stroke-Association Internationale pour la Recherche et l'Enseignement en Neurosciences; NOSGER-IADL=Nurses Observation Scale for Geriatric Assessment-Instrumental Activities of Daily Living subscale; NOSGER-Mood=Nurses Observation Scale for Geriatric Assessment-Mood; NPI-4=Neuropsychiatric Inventory-subscore 4; NPI-NH=Neuropsychiatric Inventory-Nursing Home Version; NT=not tested; PB=Placebo;

PDS=Progressive Deterioration Scale; PGA=Patient Global Assessment; PSMS=Physical Self-maintenance Scale; QoL=Quality of Life; RPT=Rivermead Profile Test; RR=Relative risk; SIB=Severe Impairment Battery; SKT=Syndrome Kurz Test, syndrome short test; TP=Toulouse Pieron; VaD=Vascular Dementia
