# Supplementary material
Source: HighWire-hosted journal article supplement (https://www.annals.org/content/suppl/2008/02/27/148.5.379)
Supplement: Raina_AT3_148-5-379-DC1-3.pdf [file Raina_AT3_148-5-379-DC1-3.pdf]

Appendix Table 3. Adverse Events Characteristics\*

| Donepezil versus Placebo                                                             |        |         |          |         |           |         |                   |         |                  |         |                                |         |                                      |         |                               |
|--------------------------------------------------------------------------------------|--------|---------|----------|---------|-----------|---------|-------------------|---------|------------------|---------|--------------------------------|---------|--------------------------------------|---------|-------------------------------|
| Author Year                                                                          | Nausea |         | Diarrhea |         | Dizziness |         | Accidental Injury |         | Urinary Disorder |         | Serious [severe] Adverse Event |         | Withdrawals due to any Adverse Event |         | Quality Score (max score=5)   |
|                                                                                      | PL (%) | DPZ (%) | PL (%)   | DPZ (%) | PL (%)    | DPZ (%) | PL (%)            | DPZ (%) | PL (%)           | DPZ (%) | PL (%)                         | DPZ (%) | PL (%)                               | DPZ (%) | Total                         |
| Black 2003† (22)<br>Pratt 2002 (107)<br>PL = 199<br>DPZ = 206                        | 7      | 16      | 10       | 15      | NR        | NR      | NR                | NR      | NR               | NR      | 15                             | 22      | 11                                   | 22      | WD: 2/2<br>FH: 2/2<br>AP: 1/  |
| Burns 1999† (9)<br>PL = 274<br>DPZ = 544                                             | 7      | 24      | 4        | 16      | 5         | 9       | NR                | NR      | NR               | NR      | 11                             | 9       | 10                                   | 14      | WD: 2/2<br>FH: 0/2<br>AP: 1/1 |
| Courtney 2004 (24)<br>PL = 283<br>DPZ = 282                                          | NR     | NR      | NR       | NR      | NR        | NR      | NR                | NR      | NR               | NR      | NR                             | NR      | 8                                    | 10      | WD: 2/2<br>FH: 0/2<br>AP: 1/  |
| dos Santos Moraes 2006 (30)<br>PL = 8<br>DPZ = 17                                    | NR     | NR      | NR       | NR      | NR        | NR      | NR                | NR      | NR               | NR      | NR                             | NR      | NR                                   | NR      | WD: 1/2<br>FH: 0/2<br>AP: 0/1 |
| Feldman 2001(14)<br>Gauthier 2002 (98)<br>Feldman 2003 (99)<br>PL = 146<br>DPZ = 144 | 4      | 7       | 5        | 13      | 5         | 6       | 10                | 8       | 4                | 6       | 12                             | 13      | 6                                    | 8       | WD: 1/2<br>FH: 0/2<br>AP: 1/1 |
| Holmes 2004 (25)<br>PL = 55<br>DPZ = 41                                              | NR     | NR      | NR       | NR      | NR        | NR      | NR                | NR      | NR               | NR      | NR                             | NR      | NR                                   | 8       | WD: 2/2<br>FH: 0/2<br>AP: 0/  |
| Kemp 2003 (26)<br>PL = 6<br>DPZ = 6                                                  | NR     | NR      | NR       | NR      | NR        | NR      | NR                | NR      | NR               | NR      | NR                             | NR      | 0                                    | 1       | WD: 2/2<br>FH: 0/2<br>AP: 0/1 |
| Krishnan 2003 (27)<br>PL = 33<br>DPZ = 34                                            | NR     | NR      | NR       | NR      | NR        | NR      | NR                | NR      | NR               | NR      | NR                             | NR      | 1                                    | 0       | WD: 2/2<br>FH: 0/2<br>AP: 1/  |
| Leroi 2003 (28)<br>PL = 9<br>DPZ = 7                                                 | NR     | NR      | NR       | NR      | NR        | NR      | NR                | NR      | NR               | NR      | NR                             | NR      | 11                                   | 57      | WD: 2/2<br>FH: 0/2<br>AP: 1/  |

|                                                                                                         |    |    |    |    |    |    |    |    |    |    |    |    |    |    |                               |                               |
|---------------------------------------------------------------------------------------------------------|----|----|----|----|----|----|----|----|----|----|----|----|----|----|-------------------------------|-------------------------------|
| Mazza 2006 (31)<br>PL = 25<br>DPZ = 26                                                                  | NR | 16                            | WD: 1/2<br>FH: 0/2<br>AP: 0/1 |
| Mohs 2001(15)<br>PL = 217<br>DPZ = 214                                                                  | 4  | 9  | 5  | 17 | NR | NR | 3  | 6  | 7  | 13 | 9  | 12 | 7  | 11 | WD: 2/2<br>FH: 0/2<br>AP: 1/1 |                               |
| Petersen 2005† (32)<br>PL = 259<br>DPZ = 253<br>VitE = 257                                              | 2  | 8  | 7  | 17 | NR | WD: 0/2<br>FH: 1/2<br>AP: 1/1 |                               |
| Prasher 2002 (12)<br>PL = 14<br>DPZ = 16                                                                | 7  | 4  | 21 | 38 | 14 | 13 | NR | NR | NR | NR | 20 | 50 | 0  | 7  | WD: 2/2<br>FH: 1/2<br>AP: 1/1 |                               |
| Rogers 1996 (19)<br>Rogers 2000 (100)<br>Neumann1999 (101)<br>Rogers 1998 (102)<br>PL = 40<br>‡DPZ = 39 | 5  | 10 | 3  | 10 | 10 | 8  | 3  | 10 | 5  | 3  | NR | NR | 5  | 13 | WD: 1/2<br>FH: 0/2<br>AP: 1/1 |                               |
| Rogers 1998a (18)<br>Doody 2001(103)<br>Steele 1999 (104)<br>PL =153<br>‡DPZ = 158                      | 8  | 22 | 3  | 13 | 7  | 9  | 7  | 6  | 13 | 4  | 5  | 4  | 1  | 9  | WD: 1/2<br>FH: 1/2<br>AP: 1/1 |                               |
| Rogers 1998b (17)<br>Doody 2001 (103)<br>Sparano 1998 (105)<br>PL = 162<br>‡DPZ = 157                   | 4  | 17 | 7  | 17 | 4  | 8  | NR | NR | NR | NR | 6  | 10 | 7  | 16 | WD: 1/2<br>FH: 1/2<br>AP: 1/1 |                               |
| Salloway 2004† (21)<br>PL =137<br>DPZ =133                                                              | 7  | 15 | 7  | 27 | NR | NR | NR | NR | NR | NR | 5  | 3  | 7  | 22 | WD: 2/2<br>FH: 1/2<br>AP: 1/1 |                               |
| Seltzer 2004 (10)<br>PL = 57<br>DPZ = 96                                                                | 4  | 10 | 9  | 20 | 2  | 8  | 0  | 6  | NR | NR | 5  | 5  | 9  | 16 | WD: 2/2<br>FH: 2/2<br>AP: 1/1 |                               |
| Tariot 2001 (16)<br>PL =105<br>DPZ =103                                                                 | 4  | 9  | 10 | 15 | 8  | 8  | 55 | 65 | 20 | 16 | 16 | 10 | 11 | 18 | WD: 1/2<br>FH: 0/2<br>AP: 1/1 |                               |
| Thomas 2001 (20)<br>Vit E = 20<br>DPZ = 20<br>RIV = 20                                                  | NR | 0  | 0  | 0  | 20                            | WD: 2/2<br>FH: 0/2<br>AP: 1/1 |

|                                             |    |    |    |    |    |    |    |    |    |    |    |    |    |    |   |                               |
|---------------------------------------------|----|----|----|----|----|----|----|----|----|----|----|----|----|----|---|-------------------------------|
| Tune 2003 (29)<br>PL =14<br>DPZ =14         | NR | 0  | 0 | WD: 2/2<br>FH: 0/2<br>AP: 0/1 |
| Wilkinson 2003†<br>(106)                    |    |    |    |    |    |    |    |    |    |    |    |    |    |    |   | WD: 2/2<br>FH: 2/2<br>AP: 1/  |
| Pratt 2002 (107)<br>PL =193<br>‡DPZ =215    | 8  | 17 | 10 | 19 | 11 | 8  | 10 | 13 | 8  | 7  | 17 | 15 | 9  | 16 |   | WD: 2/2<br>FH: 2/2<br>AP: 1/  |
| Winblad 2001 (13)                           |    |    |    |    |    |    |    |    |    |    |    |    |    |    |   | WD: 1/2<br>FH: 2/2<br>AP: 1/1 |
| Winblad 2006 (108)<br>PL = 144<br>DPZ = 142 | 9  | 11 | 7  | 7  | 4  | 6  | 4  | 6  | 7  | 6  | 14 | 25 | 6  | 7  |   | WD: 1/2<br>FH: 1/2<br>AP: 1/1 |
| Winblad 2006 (33)<br>PL = 120<br>DPZ = 128  | 4  | 6  | 3  | 9  | NR | NR | 5  | 6  | 4  | 6  | 24 | 26 | 7  | 16 |   | WD: 1/2<br>FH: 1/2<br>AP: 1/1 |

**Donepezil versus Galantamine**

| Author<br>Year                             | Nausea     |            | Diarrhea   |            | Dizziness  |            | Accidental<br>Injury |            | Urinary<br>Disorder |            | Serious<br>[severe]<br>Adverse<br>Event |            | Withdrawals<br>due to any<br>Adverse Event |            | Quality Score<br>(max score=5) |                               |
|--------------------------------------------|------------|------------|------------|------------|------------|------------|----------------------|------------|---------------------|------------|-----------------------------------------|------------|--------------------------------------------|------------|--------------------------------|-------------------------------|
|                                            | GAL<br>(%) | DPZ<br>(%) | GAL<br>(%) | DPZ<br>(%) | GAL<br>(%) | DPZ<br>(%) | GAL<br>(%)           | DPZ<br>(%) | GAL<br>(%)          | DPZ<br>(%) | GAL<br>(%)                              | DPZ<br>(%) | GAL<br>(%)                                 | DPZ<br>(%) |                                | Total                         |
| Wilcock 2003† (34)<br>DPZ = 97<br>GAL = 91 | 18         | 20         | NR         | NR         | NR         | NR         | NR                   | NR         | NR                  | NR         | NR                                      | NR         | NR                                         | 20         | 19                             | WD: 2/2<br>FH: 1/2<br>AP: 1/1 |
| Ancoli-Israel 2005<br>(35)<br>DPZ=<br>GAL  | 10         | 3          | 3          | 16         | NR         | NR         | 7                    | 6          | NR                  | NR         | NR                                      | NR         | 16                                         | 13         |                                | WD: 1/2<br>FH: 0/2<br>AP: 1/1 |

**Donepezil versus Rivastigmine**

| Author<br>Year                                                              | Nausea     |            | Diarrhea   |            | Dizziness  |            | Accidental<br>Injury |            | Urinary<br>Disorder |            | Serious<br>[severe]<br>Adverse<br>Event |            | Withdrawals<br>due to any<br>Adverse Event |            | Quality Score<br>(max score=5) |                               |
|-----------------------------------------------------------------------------|------------|------------|------------|------------|------------|------------|----------------------|------------|---------------------|------------|-----------------------------------------|------------|--------------------------------------------|------------|--------------------------------|-------------------------------|
|                                                                             | RIV<br>(%) | DPZ<br>(%) | RIV<br>(%) | DPZ<br>(%) | RIV<br>(%) | DPZ<br>(%) | RIV<br>(%)           | DPZ<br>(%) | RIV<br>(%)          | DPZ<br>(%) | RIV<br>(%)                              | DPZ<br>(%) | RIV<br>(%)                                 | DPZ<br>(%) |                                | Total                         |
| Bullock 2005† (37)<br>Bullock 2006 (36)<br>RIV = 495§/404<br>DPZ = 499§/453 | 33§<br>12  | 15§<br>5   | 8§<br>6    | 7§<br>7    | NR         | NR         | NR                   | NR         | 2§<br>5             | 3§<br>6    | 32                                      | 33         | 14§<br>18                                  | 7§<br>14   |                                | WD: 1/2<br>FH: 2/2<br>AP: 1/1 |

| Galantamine versus Placebo                                               |           |            |           |            |           |            |                      |            |                     |            |                                   |            |                                            |            |                                        |       |
|--------------------------------------------------------------------------|-----------|------------|-----------|------------|-----------|------------|----------------------|------------|---------------------|------------|-----------------------------------|------------|--------------------------------------------|------------|----------------------------------------|-------|
| Author<br>Year                                                           | Nausea    |            | Diarrhea  |            | Dizziness |            | Accidental<br>Injury |            | Urinary<br>Disorder |            | Serious [severe]<br>Adverse Event |            | Withdrawals<br>due to any<br>Adverse Event |            | Quality<br>Score<br>(max score<br>= 5) |       |
|                                                                          | PL<br>(%) | GAL<br>(%) | PL<br>(%) | GAL<br>(%) | PL<br>(%) | GAL<br>(%) | PL<br>(%)            | GAL<br>(%) | PL<br>(%)           | GAL<br>(%) | PL<br>(%)                         | GAL<br>(%) | PL<br>(%)                                  | GAL<br>(%) |                                        | Total |
| Brodaty 2005 (46)<br>Dunbar 2006 (49)<br>PL=320<br>GAL=326<br>GAL PR=319 | 5         | 14/17      | 7         | 7/5        | 4         | 7/10       | 6                    | 4/8        | 8                   | 7/7        | 1                                 | 1/1        | 5                                          | 7/9        | WD: 1/2<br>FH: 1/2<br>AP: 1/1          |       |
| Bullock,<br>2004 (45)<br>PL=86<br>GAL=152                                | 28        | 22         | 14        | 13         | 12        | 17         | 13                   | 8          | 6                   | 8          | NR                                | NR         | 17                                         | 26         | WD: 1/2<br>FH: 0/2<br>AP: 1/1          |       |
| Erkinjuntti,<br>2002† (43)<br>PL=196<br>GAL=396                          | 7         | 24         | NR        | NR         | NR        | NR         | 15                   | 3          | NR                  | NR         | NR                                | NR         | 8                                          | 20         | WD: 1/2<br>FH: 0/2<br>AP: 1/1          |       |
| Koontz 2005 (47)<br>PL=11<br>GAL =8                                      | NR        | NR         | NR        | NR         | NR        | NR         | NR                   | NR         | NR                  | NR         | NR                                | NR         | NR                                         | NR         | WD: 0/2<br>FH: 0/2<br>AP: 0/1          |       |
| Raskind 2000† (41)<br>PL=213<br>‡GAL=211                                 | 13        | 37         | 10        | 12         | 11        | 14         | NR                   | NR         | NR                  | NR         | 13                                | 16         | 8                                          | 32         | WD: 1/2<br>FH: 1/2<br>AP: 1/1          |       |
| Rockwood 2001† (40)<br>PL=125<br>GAL=261                                 | 11        | 32         | NR        | NR         | 4         | 15         | NR                   | NR         | NR                  | NR         | 6                                 | 8          | 4                                          | 25         | WD: 2/2<br>FH: 1/2<br>AP: 1/1          |       |
| Tariot 2000† (39)<br>PL=286<br>‡GAL=273                                  | 5         | 17         | 6         | 6          | NR        | NR         | NR                   | NR         | NR                  | NR         | 11                                | 13         | 7                                          | 10         | WD: 1/2<br>FH: 1/2<br>AP: 1/1          |       |
| Wilcock 2000 (42)<br>Wilcock 2001 (109)<br>PL=215<br>‡GAL=218            | 12        | 40         | 7         | 13         | 5         | 12         | NR                   | NR         | NR                  | NR         | 12                                | 13         | 9                                          | 18         | WD: 1/2<br>FH: 1/2<br>AP: 1/1          |       |
| Wilkinson 2001† (44)<br>PL=87<br>‡GAL=54                                 | 3         | 37         | 2         | 4          | 3         | 7          | NR                   | NR         | NR                  | NR         | 3                                 | 9          | 6                                          | 54         | WD: 1/2<br>FH: 1/2<br>AP: 1/1          |       |
| Wilkinson 2005 (48)                                                      | NA        | NA         | NA        | NA         | NA        | NA         | NA                   | NA         | NA                  | NA         | NA                                | NA         | NA                                         | NA         | NA                                     |       |

| <b>Rivastigmine versus Placebo</b>               |           |            |           |            |           |            |                      |            |                     |            |                                      |            |                                            |            |                                  |                               |  |
|--------------------------------------------------|-----------|------------|-----------|------------|-----------|------------|----------------------|------------|---------------------|------------|--------------------------------------|------------|--------------------------------------------|------------|----------------------------------|-------------------------------|--|
| Author<br>Year                                   | Nausea    |            | Diarrhea  |            | Dizziness |            | Accidental<br>Injury |            | Urinary<br>Disorder |            | Serious<br>[severe]<br>Adverse Event |            | Withdrawals<br>due to any<br>Adverse Event |            | Quality Score<br>(max score = 5) |                               |  |
|                                                  | PL<br>(%) | RIV<br>(%) | PL<br>(%) | RIV<br>(%) | PL<br>(%) | RIV<br>(%) | PL<br>(%)            | RIV<br>(%) | PL<br>(%)           | RIV<br>(%) | PL<br>(%)                            | RIV<br>(%) | PL<br>(%)                                  | RIV<br>(%) | Total                            |                               |  |
| Agid† 1998 (50)<br>PL=133<br>‡RIV=133            | 6         | 31         | 2         | 12         | 7         | 20         | NR                   | NR         | NR                  | NR         | 2                                    | 6          | 4                                          | 12         | WD: 2/2<br>FH: 1/2<br>AP: 1/1    |                               |  |
| Ballard 2005 (57)<br>PBO=31<br>RIV=31<br>QUET=31 | NR        | NR         | NR        | NR         | NR        | NR         | NR                   | NR         | NR                  | NR         | NR                                   | NR         | NR                                         | NR         | WD: 1/2<br>FH: 0/2<br>AP: 0/1    |                               |  |
| Corey-Bloom† 1998<br>(51)<br>PL=235<br>‡RIV=231  | 11        | 48         | NR        | NR         | 13        | 24         | NR                   | NR         | NR                  | NR         | NR                                   | NR         | 7                                          | 29         | WD: 1/2<br>FH: 0/2<br>AP: 1/1    |                               |  |
| Emre† 2004 (52)<br>PL=179<br>RIV=362             | 11        | 29         | 5         | 7          | 1         | 6          | NR                   | NR         | NR                  | NR         | 15                                   | 13         | 8                                          | 17         | WD: 2/2<br>FH: 2/2<br>AP: 1/1    |                               |  |
| Forette 1999 (11)<br>PL=24<br>RIV=45             | 8         | 58         | NR        | NR         | 0         | 27         | NR                   | NR         | NR                  | NR         | NR                                   | NR         | 4                                          | 22         | WD: 2/2<br>FH: 2/2<br>AP: 1/1    |                               |  |
| Karaman 2005 (53)<br>PL = 20<br>RIV = 24         | 15        | 17         | NR        | NR         | 15        | 8          | NR                   | NR         | NR                  | NR         | NR                                   | NR         | 0                                          | 13         | WD: 1/2<br>FH: 1/2<br>AP: 1/1    |                               |  |
| McKeith 2000 (54)<br>PL=61<br>RIV=59             | NR        | NR         | NR        | NR         | NR        | NR         | NR                   | NR         | NR                  | NR         | NR                                   | 13         | 17                                         | 11         | 12                               | WD: 1/2<br>FH: 2/2<br>AP: 1/1 |  |
| Potkin 2001(55)<br>PL= 7<br>‡RIV= 8              | NR        | NR         | NR        | NR         | NR        | NR         | NR                   | NR         | NR                  | NR         | NR                                   | NR         | NR                                         | NR         | WD: 0/2<br>FH: 0/2<br>AP: 0/1    |                               |  |
| Rösler 1999 (56)<br>PL=239<br>‡RIV=243           | 10        | 50         | 9         | 17         | 7         | 20         | NR                   | NR         | NR                  | NR         | 18                                   | 18         | 7                                          | 23         | WD: 1/2<br>FH: 0/2<br>AP: 1/1    |                               |  |

**Tacrine versus Placebo**

| Author<br>Year                         | Nausea |         | Diarrhea |         | Dizziness |         | Accidental Injury |         | Urinary Disorder |         | Severe Adverse Event |         | Withdrawals due to any Adverse Event |         | (Quality Score max score = 5)<br><br>Total |                               |
|----------------------------------------|--------|---------|----------|---------|-----------|---------|-------------------|---------|------------------|---------|----------------------|---------|--------------------------------------|---------|--------------------------------------------|-------------------------------|
|                                        | PL (%) | THA (%) | PL (%)   | THA (%) | PL (%)    | THA (%) | PL (%)            | THA (%) | PL (%)           | THA (%) | PL (%)               | THA (%) | PL (%)                               | THA (%) |                                            |                               |
| Knapp 1994 (58)<br>PL=181<br>THA=238   | NR     | 35      | NR       | 18      | 13        | 14      | NR                | NR      | NR               | NR      | NR                   | NR      | NR                                   | NR      | 55                                         | WD: 2/2<br>FH: 0/2<br>AP: 1/1 |
| Maltby 1994 (59)<br>PL=21<br>THA=20    | NR     | NR      | NR       | NR      | NR        | NR      | NR                | NR      | NR               | NR      | NR                   | NR      | NR                                   | 14      | 30                                         | WD: 2/2<br>FH: 0/2<br>AP: 1/1 |
| Prentice 1996 (60)<br>PL= 9<br>THA =13 | NR     | NR      | NR       | NR      | NR        | NR      | NR                | NR      | NR               | NR      | NR                   | NR      | NR                                   | 0       | 13                                         | WD: 2/2<br>FH: 0/2<br>AP: 0/1 |
| Wong 1999 (62)<br>PL=24<br>THA=70      | 0      | 14      | 0        | 4       | 0         | 4       | NR                | NR      | NR               | NR      | NR                   | NR      | NR                                   | NR      | NR                                         | WD: 2/2<br>FH: 0/2<br>AP: 0/1 |
| Wood 1994 (63)<br>PL=73<br>THA=76      | 7      | 33      | 4        | 5       | 0         | 10      | NR                | NR      | 0                | 5       | NR                   | NR      | 11                                   | 17      |                                            | WD: 2/2<br>FH: 0/2<br>AP: 1/1 |
| Weinstein 1991(61)<br>PL=6<br>THA=6    | NR     | NR      | NR       | NR      | NR        | NR      | NR                | NR      | NR               | NR      | NR                   | NR      | NR                                   | NR      | NR                                         | WD: 2/2<br>FH: 0/2<br>AP: 1/1 |

**Tacrine versus Other**

| Author<br>Year                          | Nausea  |         | Diarrhea |         | Dizziness |         | Accidental Injury |         | Urinary Disorder |         | Severe Adverse Event |         | Withdrawals due to any Adverse Event |         | (Quality Score max score = 5)<br><br>Total |
|-----------------------------------------|---------|---------|----------|---------|-----------|---------|-------------------|---------|------------------|---------|----------------------|---------|--------------------------------------|---------|--------------------------------------------|
|                                         | OTH (%) | THA (%) | OTH (%)  | THA (%) | OTH (%)   | THA (%) | OTH (%)           | THA (%) | OTH (%)          | THA (%) | OTH (%)              | THA (%) | OTH (%)                              | THA (%) |                                            |
| Gutzmann 2002 (64)<br>IDB=104<br>THA=99 | 6       | 21      | NR       | NR      | NR        | NR      | NR                | NR      | NR               | NR      | 4                    | 5       | 17                                   | 42      | WD: 1/2<br>FH: 2/2<br>AP: 0/1              |

**Memantine versus Placebo**

| Author<br>Year                                                                      | Nausea    |            | Diarrhea  |            | Dizziness |            | Agitation |            | Urinary<br>Disorder |            | Serious [severe]<br>Adverse Event |            | Withdrawals<br>due to any<br>Adverse Event |            | Quality<br>Score<br>(max score<br>= 5)<br><br>Total |                               |
|-------------------------------------------------------------------------------------|-----------|------------|-----------|------------|-----------|------------|-----------|------------|---------------------|------------|-----------------------------------|------------|--------------------------------------------|------------|-----------------------------------------------------|-------------------------------|
|                                                                                     | PL<br>(%) | MEM<br>(%) | PL<br>(%) | MEM<br>(%) | PL<br>(%) | MEM<br>(%) | PL<br>(%) | MEM<br>(%) | PL<br>(%)           | MEM<br>(%) | PL<br>(%)                         | MEM<br>(%) | PL<br>(%)                                  | MEM<br>(%) |                                                     |                               |
| Orgogozo 2002 (65)<br>PL=202<br>MEM=201                                             | NR        | NR         | NR        | NR         | NR        | NR         | NR        | NR         | NR                  | NR         | NR                                | 23         | 26                                         | 12         | 13                                                  | WD: 1/2<br>FH: 2/2<br>AP: 1/1 |
| Peskind 2006 (69)<br>PL=156<br>MEM=165                                              | NR        | NR         | NR        | NR         | 5         | 5          | 6         | 8          | 0                   | 0          | 10                                | 10         | 5                                          | 9          | WD: 1/2<br>FH: 1/2<br>AP: 1/1                       |                               |
| Reisberg 2003 (68)<br>Wimo 2003 (131)<br>PL=126<br>MEM=126                          | NR        | NR         | 8         | 10         | NR        | NR         | 32        | 18         | 24                  | 17         | 18                                | 13         | 17                                         | 10         | WD: 2/2<br>FH: 1/2<br>AP: 0/1                       |                               |
| Tariot 2004 (70)<br>Van Dyck 2005 (132)<br>Cummings 2006 (133)<br>PL=201<br>MEM=202 | NR        | NR         | 9         | 5          | 8         | 7          | 12        | 9          | 8                   | 11         | NR                                | NR         | 13                                         | 8          | WD: 1/2<br>FH: 0/2<br>AP: 1/1                       |                               |
| Wilcock 2002 (66)<br>PL=284<br>MEM=295                                              | 3         | 5          | 4         | 4          | 8         | 11         | 8         | 4          | 3                   | 4          | 7                                 | 8          | 7                                          | 9          | WD: 1/2<br>FH: 2/2<br>AP: 1/1                       |                               |
| Winblad 1999 (67)<br>PL=84<br>MEM=82                                                | NR        | NR         | NR        | NR         | NR        | NR         | NR        | NR         | NR                  | NR         | NR                                | 6          | 5                                          | NR         | NR                                                  | WD: 0/2<br>FH: 2/2<br>AP: 1/1 |

\*AP = active or passive monitoring of harms; DPZ = donepezil; FH =frequency of harms (reported per arm and by severity); GAL = galantamine; MEM = memantine; NA = not available; NR = not reported; OTH = other; PL = placebo; QUET = quetiapine; RIV = rivastigmine; THA = tacrine; VitE = vitamin E; WD = withdrawals per study arm and pertype of event.

† Paper only reports adverse events experienced by at least 5% of all donepezil patients.

‡ Adverse event of highest dose reported.

§ During titration phase.
