# Supplementary material
Source: HighWire-hosted journal article supplement (https://www.annals.org/content/suppl/2008/02/27/148.5.379)
Supplement: Raina_AT4_148-5-379-DC1-4.pdf [file Raina_AT4_148-5-379-DC1-4.pdf]

Appendix Table 4. Summary Estimates of Adverse Events\*

| Number of Studies (Reference)                      | Adverse Events    | Consistency of Effects                             | Total Number of Patients (%)    |                                | Magnitude of Effect (95% CI) | Limitations of Studies |
|----------------------------------------------------|-------------------|----------------------------------------------------|---------------------------------|--------------------------------|------------------------------|------------------------|
|                                                    |                   |                                                    | Drug [min, max %]               | Placebo [min, max %]           |                              |                        |
| <b>Donepezil</b>                                   |                   |                                                    |                                 |                                |                              |                        |
| <b>Donepezil vs. placebo (Alzheimer's disease)</b> |                   |                                                    |                                 |                                |                              |                        |
| 3 (13, 14, 16)                                     | Abdominal Pain    | Moderate inconsistency (I <sup>2</sup> = 49.5%)    | 22/389 (5.7%)<br>[2.1, 9.7]     | 23/395 (5.8%)<br>[4.8, 6.8]    | RR: 0.95<br>(0.40, 2.25)     | Some limitations       |
| 8 (10, 13-16, 18, 19, 33)                          | Accidental Injury | No important inconsistency (I <sup>2</sup> = 0.0%) | 125/1024 (12.2%)<br>[5.5, 65.0] | 101/982 (10.3%)<br>[0.0, 55.2] | RR: 1.19<br>(0.98, 1.44)     | Some limitations       |
| 4 (15, 18, 19, 12)                                 | Agitation         | No important inconsistency (I <sup>2</sup> = 0.0%) | 42/427 (9.8%)<br>[2.6, 18.8]    | 34/424 (8.0%)<br>[0.0, 9.7]    | RR: 1.20<br>(0.78, 1.86)     | Some limitations       |
| 6 (9, 12, 15-18,)                                  | Anorexia          | No important inconsistency (I <sup>2</sup> = 0.0%) | 67/921 (7.3%)<br>[5.6, 18.8]    | 19/925 (2.1%)<br>[0.0, 4.8]    | RR: 3.21<br>(1.94, 5.33)     | Some limitations       |
| 2 (13, 33)                                         | Anxiety           | High inconsistency (I <sup>2</sup> = 55.4%)        | 23/270 (8.5%)<br>[6.3, 10.6]    | 18/264 (6.8%)<br>[5.6, 8.3]    | RR: 1.21<br>(0.49, 3.02)     | Some limitations       |
| 2 (14, 16)                                         | Arthralgia        | High inconsistency (I <sup>2</sup> = 82.5%)        | 20/247 (8.1%)<br>[6.9, 14.3]    | 17/251 (6.8%)<br>[1.4, 14.3]   | RR: 1.67<br>(0.23, 12.32)    | Some limitations       |
| 6 (10, 13-16, 33)                                  | Asthenia          | No important inconsistency (I <sup>2</sup> = 2.0%) | 65/827 (7.9%)<br>[3.1, 13.6]    | 37/789 (4.7%)<br>[1.8, 8.6]    | RR: 1.65<br>(1.09, 2.48)     | Some limitations       |
| 2 (14, 16)                                         | Back pain         | No important inconsistency (I <sup>2</sup> = 0.0%) | 24/247 (9.7%)<br>[7.6, 12.6]    | 15/251 (6.0%)<br>[4.8, 7.6]    | RR: 1.63<br>(0.88, 3.02)     | Some limitations       |
| 2 (18, 19)                                         | Common cold       | No important inconsistency (I <sup>2</sup> = 0.0%) | 9/197 (4.6%)<br>[4.4, 5.1]      | 12/193 (6.2%)<br>[5.0, 6.5]    | RR: 0.74<br>(0.32, 1.71)     | Some limitations       |
| 4 (9, 13, 14, 16)                                  | Confusion         | No important inconsistency (I <sup>2</sup> = 0.0%) | 35/662 (5.3%)<br>[2.8, 6.3]     | 42/669 (6.3%)<br>[5.5, 8.6]    | RR: 0.85<br>(0.55, 1.32)     | Some limitations       |
| 3 (13, 19, 33)                                     | Constipation      | No important inconsistency (I <sup>2</sup> = 0.0%) | 14/309 (4.5%)<br>[3.9, 7.7]     | 16/304 (5.3%)<br>[2.5, 6.3]    | RR: 0.84<br>(0.41, 1.72)     | Some limitations       |
| 3 (16, 18, 19)                                     | Cough             | Moderate inconsistency (I <sup>2</sup> = 25.7%)    | 21/300 (7.0%)<br>[1.9, 16.5]    | 25/298 (8.4%)<br>[5.0, 14.3]   | RR: 0.78<br>(0.36, 1.71)     | Some limitations       |
| 2 (13, 14)                                         | Depression        | No important                                       | 24/286 (8.4%)                   | 16/290 (5.5%)                  | RR: 1.52                     | Some                   |

|                                |                              |                                                        |                                 |                               |                          |                  |
|--------------------------------|------------------------------|--------------------------------------------------------|---------------------------------|-------------------------------|--------------------------|------------------|
|                                |                              | inconsistency<br>(I <sup>2</sup> = 0.0%)               | [5.6, 11.3]                     | [3.4, 7.6]                    | (0.83, 2.79)             | limitations      |
| 11 (9, 10, 12-20, 33)          | Diarrhea                     | No important inconsistency<br>(I <sup>2</sup> = 15.6%) | 213/1470 (14.5%)<br>[7.0, 37.5] | 76/1432 (5.3%)<br>[2.5, 21.4] | RR: 2.57<br>(1.93, 3.41) | Some limitations |
| 9 (9, 10, 12, 13, 14, 16-, 19) | Dizziness                    | No important inconsistency<br>(I <sup>2</sup> = 0.0%)  | 91/1128 (8.1%)<br>[6.3, 12.5]   | 59/1095 (5.4%)<br>[1.8, 14.3] | RR: 1.47<br>(1.06, 2.03) | Some limitations |
| 3 (12, 17, 18)                 | Fatigue                      | No important inconsistency<br>(I <sup>2</sup> = 4.4%)  | 31/331 (9.4%)<br>[7.6, 43.8]    | 13/329 (4.0%)<br>[1.9, 14.3]  | RR: 2.24<br>(1.17, 4.30) | Some limitations |
| 3 (18, 19, 33)                 | Gastric or stomach upset     | Moderate inconsistency<br>(I <sup>2</sup> = 43.0%)     | 16/325 (4.9%)<br>[3.2, 7.7]     | 15/313 (4.8%)<br>[0.7, 10.0]  | RR: 1.22<br>(0.39, 3.81) | Some limitations |
| 6 (13-16, 18, 19)              | Headache                     | Moderate inconsistency<br>(I <sup>2</sup> = 43.0%)     | 83/800 (10.4%)<br>[2.6, 14.6]   | 55/805 (6.8%)<br>[3.2, 16.2]  | RR: 1.50<br>(0.94, 2.38) | Some limitations |
| 2 (13, 14)                     | Hostility                    | No important inconsistency<br>(I <sup>2</sup> = 0.0%)  | 18/286 (6.3%)<br>[2.8, 9.7]     | 19/290 (6.6%)<br>[5.6, 7.5]   | RR: 0.91<br>(0.37, 2.21) | Some limitations |
| 6 (9, 10, 12, 13, 15, 18)      | Insomnia                     | No important inconsistency<br>(I <sup>2</sup> = 0.0%)  | 89/899 (9.9%)<br>[5.2, 25.0]    | 38/859 (4.4%)<br>[0.0, 14.3]  | RR: 2.19<br>(1.51, 3.17) | Some limitations |
| 3 (12, 17, 18)                 | Muscle cramps and leg cramps | High inconsistency<br>(I <sup>2</sup> = 52.5%)         | 26/331 (7.9%)<br>[7.6, 12.5]    | 9/329 (2.7%)<br>[0.6, 14.3]   | RR: 2.46<br>(0.67, 9.04) | Some limitations |
| 2 (18, 19)                     | Nasal congestion             | No important inconsistency<br>(I <sup>2</sup> = 0.0%)  | 7/197 (3.6%)<br>[3.2, 5.1]      | 9/193 (4.7%)<br>[3.9, 7.5]    | RR: 0.77<br>(0.29, 2.02) | Some limitations |
| 11 (9, 10, 12-18, 20, 33)      | Nausea                       | No important inconsistency<br>(I <sup>2</sup> = 0.0%)  | 204/1451 (14.1%)<br>[6.3, 25.0] | 76/1412 (5.4%)<br>[0.0, 9.0]  | RR: 2.54<br>(1.97, 3.29) | Some limitations |
| 3 (16, 18, 19)                 | Pain                         | No important inconsistency<br>(I <sup>2</sup> = 23.2%) | 44/300 (14.7%)<br>[5.1, 20.4]   | 35/298 (11.7%)<br>[2.5, 21.9] | RR: 1.27<br>(0.75, 2.13) | Some limitations |
| 2 (14, 18)                     | Respiratory tract infection  | No important inconsistency<br>(I <sup>2</sup> = 0.0%)  | 21/302 (7.0%)<br>[3.2, 11.1]    | 22/299 (7.4%)<br>[3.9, 11.0]  | RR: 0.96<br>(0.54, 1.70) | Some limitations |
| 3 (15, 16, 17)                 | Rhinitis                     | No important inconsistency<br>(I <sup>2</sup> = 0.0%)  | 51/474 (10.8%)<br>[5.7, 16.5]   | 34/484 (7.0%)<br>[2.5, 15.2]  | RR: 1.49<br>(0.99, 2.26) | Some limitations |
| 7 (13-16, 18, 19, 33)          | Urinary tract infection      | High inconsistency<br>(I <sup>2</sup> = 58.9%)         | 90/928 (9.7%)<br>[2.6, 17.2]    | 92/925 (9.9%)<br>[4.1, 20.0]  | RR: 0.93<br>(0.58, 1.50) | Some limitations |

|                                                                   |                              |                                                    |                                |                                |                           |                        |
|-------------------------------------------------------------------|------------------------------|----------------------------------------------------|--------------------------------|--------------------------------|---------------------------|------------------------|
| 7 (9, 12, 14, 16-18, 20)                                          | Vomiting                     | Moderate inconsistency (I <sup>2</sup> = 50.4 %)   | 98/871 (11.3%)<br>[5.0, 16.1]  | 41/874 (4.7%)<br>[0.0, 14.3]   | RR: 2.25<br>(1.26, 4.03)  | Some limitations       |
| 4 (14, 15, 16, 18)                                                | Weight Loss                  | No important inconsistency (I <sup>2</sup> = 0.0%) | 51/619 (8.2%)<br>[5.1, 19.4]   | 28/621 (4.5%)<br>[2.0, 9.5]    | RR: 1.83<br>(1.18, 2.86)  | Some limitations       |
| <b>Donepezil vs. placebo (Vascular dementia)</b>                  |                              |                                                    |                                |                                |                           |                        |
| 21 (22, 23)                                                       | Abnormal dreams              | No important inconsistency (I <sup>2</sup> = 0.0%) | 24/421 (5.7%)<br>[5.1, 6.3]    | 5/392 (1.3%)<br>[0.5, 2.0]     | RR: 4.07<br>(1.54, 10.74) | Some limitations       |
| 2                                                                 | Anorexia                     | High inconsistency (I <sup>2</sup> = 68.5%)        | 36/421 (8.6%)<br>[8.3, 8.8]    | 14/392 (3.6%)<br>[1.5, 5.7]    | RR: 2.65<br>(0.77, 9.15)  | Some limitations       |
| 2                                                                 | Diarrhea                     | No important inconsistency (I <sup>2</sup> = 0.0%) | 70/421 (16.6%)<br>[14.6, 18.6] | 40/392 (10.2%)<br>[10.1, 10.4] | RR: 1.62<br>(1.13, 2.34)  | Some limitations       |
| 2                                                                 | Headache                     | Moderate inconsistency (I <sup>2</sup> = 43.4%)    | 29/421 (6.9%)<br>[6.5, 7.3]    | 25/392 (6.4%)<br>[4.5, 8.3]    | RR: 1.09<br>(0.54, 2.20)  | Some limitations       |
| 2                                                                 | Hypertension                 | No important inconsistency (I <sup>2</sup> = 0.0%) | 24/421 (5.7%)<br>[5.3, 6.0]    | 20/392 (5.1%)<br>[4.0, 6.2]    | RR: 1.11<br>(0.62, 1.98)  | Some limitations       |
| 2                                                                 | Muscle cramps and leg cramps | No important inconsistency (I <sup>2</sup> = 0.0%) | 41/421 (9.7%)<br>[6.0, 13.6]   | 4/392 (1.0%)<br>[0.5, 1.5]     | RR: 9.62<br>(3.48, 26.58) | Some limitations       |
| 2                                                                 | Nausea                       | No important inconsistency (I <sup>2</sup> = 0.0%) | 69/421 (16.4%)<br>[16.0, 16.7] | 29/392 (7.4%)<br>[7.0, 7.8]    | RR: 2.21<br>(1.47, 3.34)  | Some limitations       |
| 2                                                                 | Rhinitis                     | Moderate inconsistency (I <sup>2</sup> = 43.8%)    | 25/421 (5.9%)<br>[5.1, 6.8]    | 7/392 (1.8%)<br>[0.5, 3.0]     | RR: 3.60<br>(0.90, 14.49) | Some limitations       |
| 2                                                                 | Stroke                       | High inconsistency (I <sup>2</sup> = 62.1%)        | 20/421 (4.8%)<br>[3.7, 5.8]    | 17/392 (4.3%)<br>[3.0, 5.7]    | RR: 1.11<br>(0.38, 3.20)  | Some limitations       |
| 2                                                                 | Syncope                      | No important inconsistency (I <sup>2</sup> = 0.0%) | 19/421 (4.5%)<br>[3.9, 5.1]    | 10/392 (2.6%)<br>[1.5, 3.6]    | RR: 1.72<br>(0.81, 3.67)  | Some limitations       |
| 2                                                                 | Vomiting                     | High inconsistency (I <sup>2</sup> = 83.9%)        | 28/421 (6.7%)<br>[5.1, 8.3]    | 22/392 (5.6%)<br>[3.0, 8.3]    | RR: 1.27<br>(0.29, 5.48)  | Some limitations       |
| <b>Donepezil vs. placebo (mild cognitive impairment patients)</b> |                              |                                                    |                                |                                |                           |                        |
| 2 (21, 32)                                                        | Abnormal dreams              | No important inconsistency (I <sup>2</sup> = 0.0%) | 47/385 (12.2%)<br>[6.7, 22.7]  | 9/396 (2.3%)<br>[1.5, 3.6]     | RR: 5.36<br>(2.67, 10.76) | No serious limitations |
| 2                                                                 | Diarrhea                     | No important                                       | 78/385 (20.3%)                 | 27/396 (6.8%)                  | RR: 2.96                  | No serious             |

|   |                                    |                                                          |                                |                             |                           |                           |
|---|------------------------------------|----------------------------------------------------------|--------------------------------|-----------------------------|---------------------------|---------------------------|
|   |                                    | inconsistency<br>(I <sup>2</sup> = 0.0%)                 | [16.6, 27.3]                   | [6.6, 7.3]                  | (1.95, 4.48)              | limitations               |
| 2 | Insomnia                           | High<br>inconsistency<br>(I <sup>2</sup> = 56.3 %)       | 41/385 (10.6%)<br>[10.6, 10.7] | 12/396 (3.0%)<br>[1.9, 5.1] | RR: 3.34<br>(1.27, 8.80)  | No serious<br>limitations |
| 2 | Muscle<br>cramps and<br>leg cramps | No important<br>inconsistency<br>(I <sup>2</sup> = 0.0%) | 53/385 (13.8%)<br>[9.1, 16.2]  | 7/396 (1.8%)<br>[1.5, 1.9]  | RR: 7.73<br>(3.56, 16.8)  | No serious<br>limitations |
| 2 | Nausea                             | No important<br>inconsistency<br>(I <sup>2</sup> = 1.7%) | 41/385 (10.6%)<br>[8.3, 15.2]  | 14/396 (3.5%)<br>[1.9, 6.6] | RR: 2.92<br>(1.61, 5.31)  | No serious<br>limitations |
| 2 | Vomiting                           | High<br>inconsistency<br>(I <sup>2</sup> = 56.4%)        | 27/385 (7.0%)<br>[5.9, 9.1]    | 5/396 (1.3%)<br>[0.0, 1.9]  | RR: 6.22<br>(0.74, 52.19) | No serious<br>limitations |

### Galantamine

#### Galantamine vs. placebo (Alzheimer's disease)

|                          |                      |                                                          |                                 |                               |                          |                     |
|--------------------------|----------------------|----------------------------------------------------------|---------------------------------|-------------------------------|--------------------------|---------------------|
| 3 (40, 41,<br>45)        | Abdominal<br>Pain    | High<br>inconsistency<br>(I <sup>2</sup> = 77.1%)        | 52/624 (8.3%)<br>[6.9, 10.9]    | 21/424 (5.0%)<br>[1.6, 11.6]  | RR: 1.76<br>(0.56, 5.55) | Some<br>limitations |
| 2 (45, 46)               | Accidental<br>injury | No important<br>inconsistency<br>(I <sup>2</sup> = 0.0%) | 24/478 (5.0%)<br>[3.7, 7.9]     | 29/406 (7.1%)<br>[5.6, 12.8]  | RR: 0.64<br>(0.38, 1.08) | Some<br>limitations |
| 2 (45, 46)               | Accidental<br>Fall   | No important<br>inconsistency<br>(I <sup>2</sup> = 0.0%) | 44/478 (9.2%)<br>[6.1, 15.8]    | 33/406 (8.1%)<br>[5.9, 16.3]  | RR: 1.00<br>(0.65, 1.54) | Some<br>limitations |
| 4 (39, 40, 45,<br>46)    | Agitation            | Moderate<br>inconsistency<br>(I <sup>2</sup> = 34.2%)    | 70/1012 (6.9%)<br>[6.1, 8.1]    | 56/817 (6.9%)<br>[0.8, 9.4]   | RR: 1.02<br>(0.63, 1.65) | Some<br>limitations |
| 6 (39-42, 45,<br>46)     | Anorexia             | No important<br>inconsistency<br>(I <sup>2</sup> = 0.0%) | 154/1441 (10.7%)<br>[6.7, 20.4] | 34/1245 (2.7%)<br>[0.0, 5.6]  | RR: 3.41<br>(2.36, 4.93) | Some<br>limitations |
| 2 (39, 40)               | Deaths               | Moderate<br>inconsistency<br>(I <sup>2</sup> = 34.0%)    | 3/534 (0.6%)<br>[0.0, 1.1]      | 6/411 (1.5%)<br>[1.4, 1.6]    | RR: 0.42<br>(0.06, 2.81) | Some<br>limitations |
| 2 (45, 46)               | Depression           | No important<br>inconsistency<br>(I <sup>2</sup> = 0.0%) | 29/478 (6.1%)<br>[4.9, 8.6]     | 13/406 (3.2%)<br>[2.5, 5.8]   | RR: 1.74<br>(0.92, 3.31) | Some<br>limitations |
| 6 (39, 41, 42,<br>44-46) | Diarrhea             | Moderate<br>inconsistency<br>(I <sup>2</sup> = 29.0%)    | 128/1234 (10.4%)<br>[3.7, 19.4] | 90/1207 (7.5%)<br>[2.3, 14.0] | RR: 1.30<br>(0.94, 1.79) | Some<br>limitations |
| 6 (40-42, 44-<br>46)     | Dizziness            | No important<br>inconsistency<br>(I <sup>2</sup> = 0.0%) | 158/1222 (12.9%)<br>[7.4, 18.5] | 66/1046 (6.3%)<br>[3.4, 11.6] | RR: 1.90<br>(1.43, 2.51) | Some<br>limitations |
| 4 (40-42, 44-<br>46)     | Headache             | High<br>inconsistency                                    | 60/750 (8.0%)<br>[5.5, 14.8]    | 39/708 (5.5%)<br>[3.3, 11.6]  | RR: 1.49<br>(0.61, 3.63) | Some<br>limitations |

|                  |                             |                                                     |                                  |                                |                          |                  |
|------------------|-----------------------------|-----------------------------------------------------|----------------------------------|--------------------------------|--------------------------|------------------|
|                  |                             | (I <sup>2</sup> = 77.8%)                            |                                  |                                |                          |                  |
| 7 (39-42, 44-46) | Nausea                      | High inconsistency (I <sup>2</sup> = 83.7%)         | 407/1495 (27.2%)<br>[13.8, 43.6] | 124/1332 (9.3%)<br>[3.4, 27.9] | RR: 2.84<br>(1.76, 4.61) | Some limitations |
| 2 (45, 46)       | Respiratory tract infection | No important inconsistency (I <sup>2</sup> = 0.0%)  | 24/478 (5.0%)<br>[3.7, 7.9]      | 21/406 (5.2%)<br>[5.0, 5.8]    | RR: 0.91<br>(0.50, 1.65) | Some limitations |
| 2 (45, 46)       | Urinary tract infection     | No important inconsistency (I <sup>2</sup> = 0.0%)  | 34/478 (7.1%)<br>[6.7, 7.9]      | 31/406 (7.6%)<br>[5.8, 8.1]    | RR: 0.93<br>(0.57, 1.50) | Some limitations |
| 7 (39-42, 44-46) | Vomiting                    | Moderate inconsistency (I <sup>2</sup> = 49.3%)     | 209/1495 (14.0%)<br>[8.6, 25.6]  | 54/1332 (4.1%)<br>[1.4, 10.5]  | RR: 3.27<br>(2.13, 5.01) | Some limitations |
| 3 (41, 42, 46)   | Weight loss                 | No important inconsistency (I <sup>2</sup> = 18.8%) | 51/755 (6.8%)<br>[5.0, 10.9]     | 15/748 (2.0%)<br>[0.5, 8.1]    | RR: 3.29<br>(1.66, 6.53) | Some limitations |

### Rivastigmine

#### Rivastigmine vs. placebo (Alzheimer's disease)

|                    |                |                                                     |                                 |                               |                           |                  |
|--------------------|----------------|-----------------------------------------------------|---------------------------------|-------------------------------|---------------------------|------------------|
| 2 (53, 56)         | Abdominal pain | No important inconsistency (I <sup>2</sup> = 17.6%) | 30/267 (11.2%)<br>[4.2, 11.9]   | 8/259 (3.1%)<br>[2.9, 5.0]    | RR: 3.19<br>(1.03, 9.83)  | Some limitations |
| 4 (11, 51, 53, 56) | Anorexia       | Moderate inconsistency (I <sup>2</sup> = 38.9%)     | 90/543 (16.6%)<br>[8.3, 19.9]   | 13/518 (2.5%)<br>[0.0, 10.0]  | RR: 5.34<br>(2.30, 12.42) | Some limitations |
| 2 (50, 56)         | Diarrhea       | High inconsistency (I <sup>2</sup> = 72.3%)         | 56/376 (14.9%)<br>[12.0, 16.5]  | 23/372 (6.2%)<br>[1.5, 8.8]   | RR: 3.30<br>(0.80, 13.67) | Some limitations |
| 5 (11, 51, 53, 56) | Dizziness      | Moderate inconsistency (I <sup>2</sup> = 39.1%)     | 143/676 (21.2%)<br>[8.3, 26.7]  | 60/651 (9.2%)<br>[0.0, 15.0]  | RR: 2.24<br>(1.45, 3.46)  | Some limitations |
| 2 (51, 56)         | Fatigue        | No important inconsistency (I <sup>2</sup> = 0.0%)  | 46/474 (9.7%)<br>[9.5, 10.0]    | 15/474 (3.2%)<br>[2.5, 3.8]   | RR: 3.04<br>(1.72, 5.38)  | Some limitations |
| 4 (11, 50, 53, 56) | Headache       | No important inconsistency (I <sup>2</sup> = 0.0%)  | 71/445 (16.0%)<br>[8.3, 18.5]   | 27/416 (6.5%)<br>[0.0, 7.5]   | RR: 2.43<br>(1.60, 3.70)  | Some limitations |
| 2 (51, 56)         | Malaise        | No important inconsistency (I <sup>2</sup> = 0.0%)  | 30/474 (6.3%)<br>[3.0, 9.5]     | 7/474 (1.5%)<br>[0.9, 2.1]    | RR: 4.24<br>(1.88, 9.55)  | Some limitations |
| 5 (11, 51, 53, 56) | Nausea         | High inconsistency (I <sup>2</sup> = 91.2%)         | 303/676 (44.8%)<br>[16.7, 57.8] | 74/651 (11.4%)<br>[6.0, 58.3] | RR: 2.79<br>(1.26, 6.19)  | Some limitations |
| 5 (11, 51, 53, 56) | Vomiting       | No important inconsistency (I <sup>2</sup> = 14.1%) | 188/676 (27.8%)<br>[12.5, 37.8] | 28/651 (4.3%)<br>[3.0, 10.0]  | RR: 6.06<br>(3.88, 9.45)  | Some limitations |

## Memantine

### Memantine vs. placebo (Alzheimer's disease)

|                    |                             |                                               |                               |                               |                          |                  |
|--------------------|-----------------------------|-----------------------------------------------|-------------------------------|-------------------------------|--------------------------|------------------|
| 3 (66, 69, 70)     | Accidental fall             | No important inconsistency ( $I^2 = 0.0\%$ )  | 48/699 (6.9%)<br>[6.1, 7.5]   | 50/687 (7.3%)<br>[7.0, 7.4]   | RR: 0.95<br>(0.65, 1.39) | Some limitations |
| 2 (69, 70)         | Accidental injury           | No important inconsistency ( $I^2 = 3.1\%$ )  | 22/404 (5.4%)<br>[4.9, 6.0]   | 27/403 (6.7%)<br>[5.4, 8.0]   | RR: 0.82<br>(0.47, 1.43) | Some limitations |
| 4 (66, 68, 69, 70) | Agitation                   | High inconsistency ( $I^2 = 73.9\%$ )         | 85/825 (10.3%)<br>[3.7, 31.7] | 82/813 (10.1%)<br>[5.9, 18.3] | RR: 0.97<br>(0.54, 1.74) | Some limitations |
| 3 (66, 69, 70)     | Confusion                   | High inconsistency ( $I^2 = 59.1\%$ )         | 48/699 (6.9%)<br>[5.0, 7.9]   | 32/687 (4.7%)<br>[2.0, 7.4]   | RR: 1.62<br>(0.75, 3.49) | Some limitations |
| 3 (66, 68, 70)     | Diarrhea                    | No important inconsistency ( $I^2 = 0.0\%$ )  | 31/624 (5.0%)<br>[4.1, 7.9]   | 39/611 (6.4%)<br>[3.5, 9.5]   | RR: 0.79<br>(0.50, 1.25) | Some limitations |
| 3 (66, 69, 70)     | Dizziness                   | No important inconsistency ( $I^2 = 0.0\%$ )  | 57/699 (8.2%)<br>[5.0, 11.2]  | 48/687 (7.0%)<br>[4.5, 8.1]   | RR: 1.16<br>(0.80, 1.68) | Some limitations |
| 2 (69, 70)         | Flu-like symptoms           | No important inconsistency ( $I^2 = 0.0\%$ )  | 29/404 (7.2%)<br>[7.0, 7.4]   | 26/403 (6.5%)<br>[6.4, 6.5]   | RR: 1.11<br>(0.67, 1.86) | Some limitations |
| 3 (66, 69, 70)     | Headache                    | No important inconsistency ( $I^2 = 9.1\%$ )  | 47/699 (6.7%)<br>[6.4, 7.1]   | 33/687 (4.8%)<br>[2.5, 6.7]   | RR: 1.39<br>(0.87, 2.21) | Some limitations |
| 2 (66, 68)         | Insomnia                    | No important inconsistency ( $I^2 = 19.5\%$ ) | 18/421 (4.3%)<br>[2.7, 7.9]   | 32/410 (7.8%)<br>[6.7, 10.3]  | RR: 0.56<br>(0.30, 1.06) | Some limitations |
| 2 (69, 70)         | Respiratory tract infection | Moderate inconsistency ( $I^2 = 27.8\%$ )     | 14/404 (3.5%)<br>[2.0, 4.9]   | 25/403 (6.2%)<br>[5.9, 6.5]   | RR: 0.56<br>(0.25, 1.22) | Some limitations |
| 3 (66, 68, 70)     | Urinary incontinence        | No important inconsistency ( $I^2 = 0.0\%$ )  | 36/624 (5.8%)<br>[3.7, 11.1]  | 29/611 (4.7%)<br>[3.0, 11.1]  | RR: 1.21<br>(0.75, 1.95) | Some limitations |
| 2 (68, 70)         | Urinary tract infection     | Moderate inconsistency ( $I^2 = 29.8\%$ )     | 29/329 (8.8%)<br>[5.9, 13.5]  | 17/327 (5.2%)<br>[5.0, 5.6]   | RR: 1.68<br>(0.84, 3.39) | Some limitations |

\*Results of the meta-analyses were computed using a random effects model. RR = relative risk.
